# Supplementary material for: A global climatological perspective on the importance of Rossby wave breaking and intense moisture transport for extreme precipitation events
Source: Copernicus journal article supplement (doi:10.5194/wcd-2020-44), 2020-09-17
Supplement: Supplementary file 1 [file wcd-2020-44-supplement.pdf]

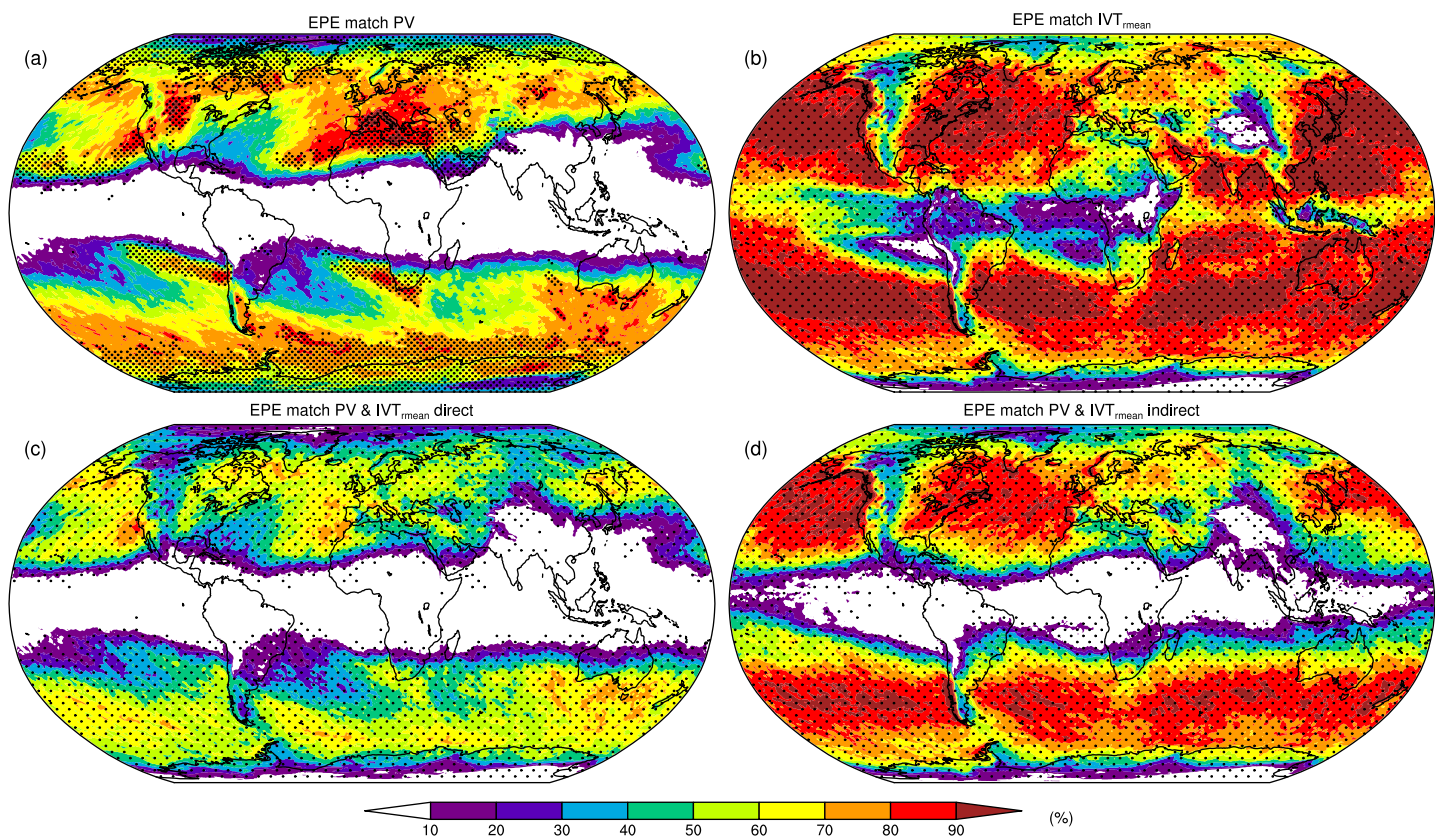

Figure S1. As Fig. 6, but for the IVTfilt form.

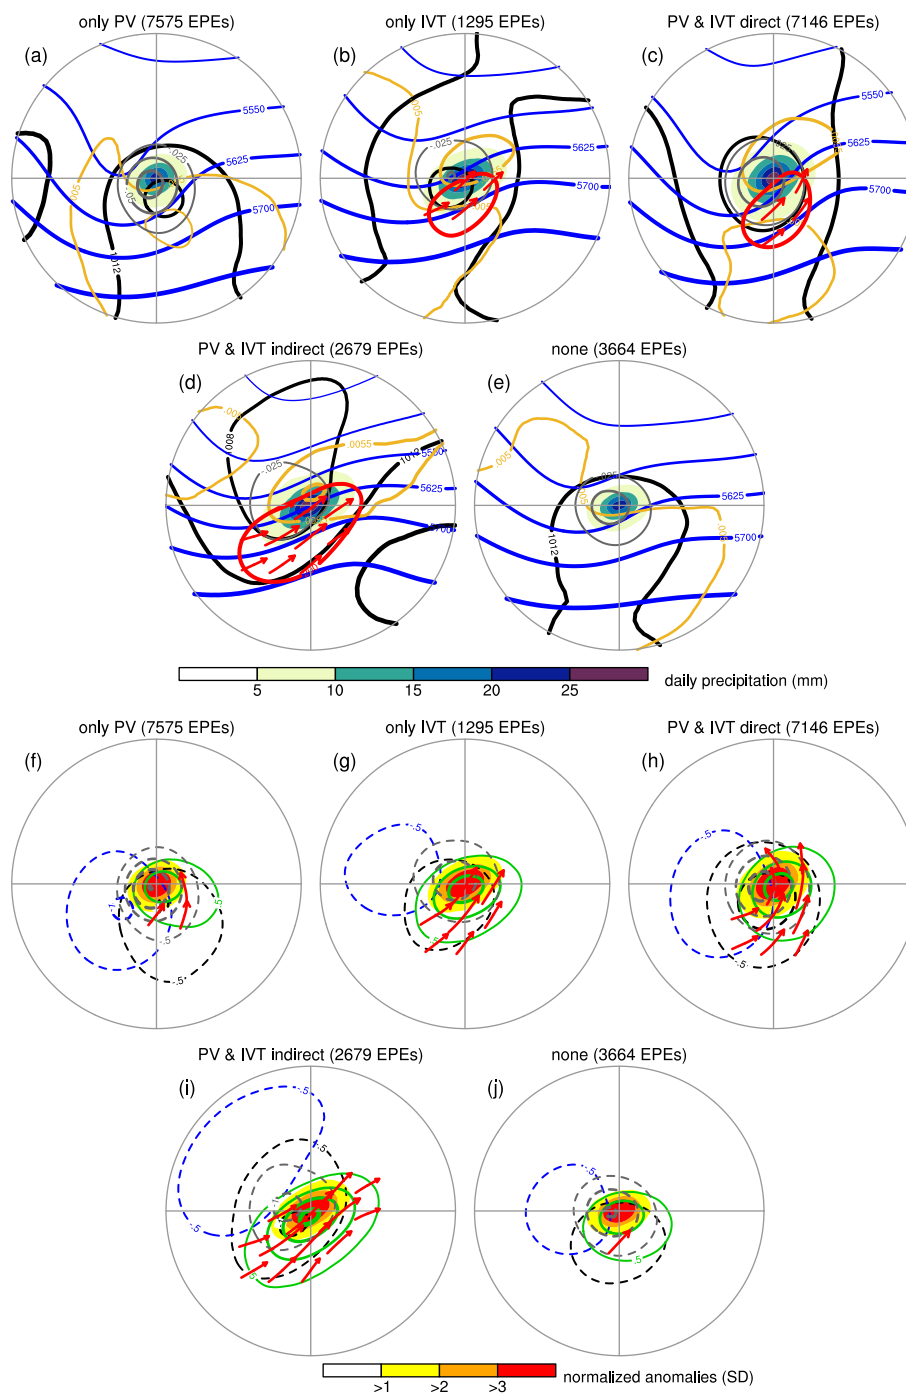

Figure S2. As Fig. 10, but for EPEs over extratropical land.

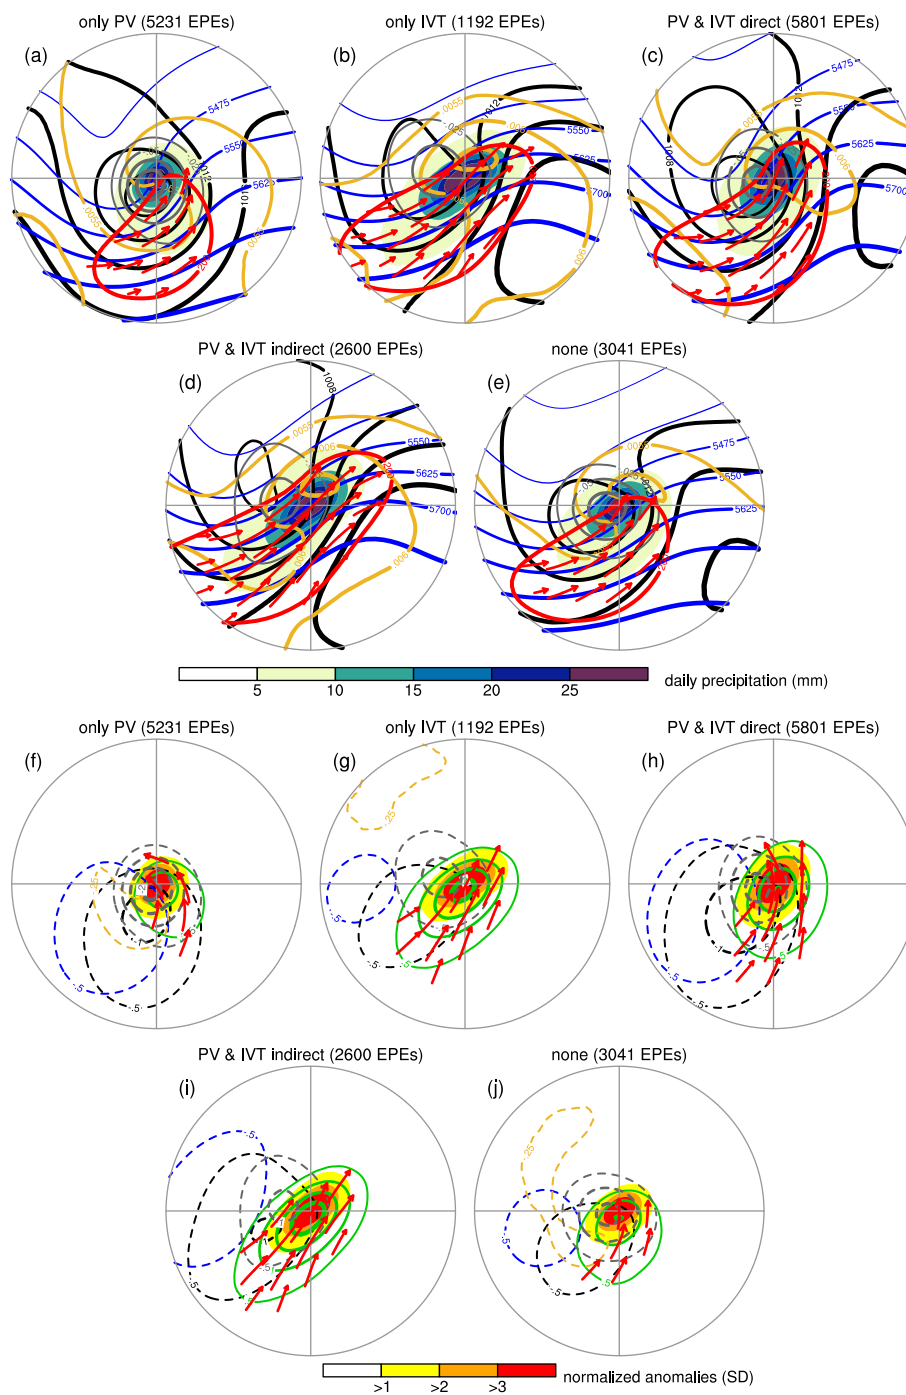

Figure S3. As Fig. 10, but for EPEs over extratropical water.

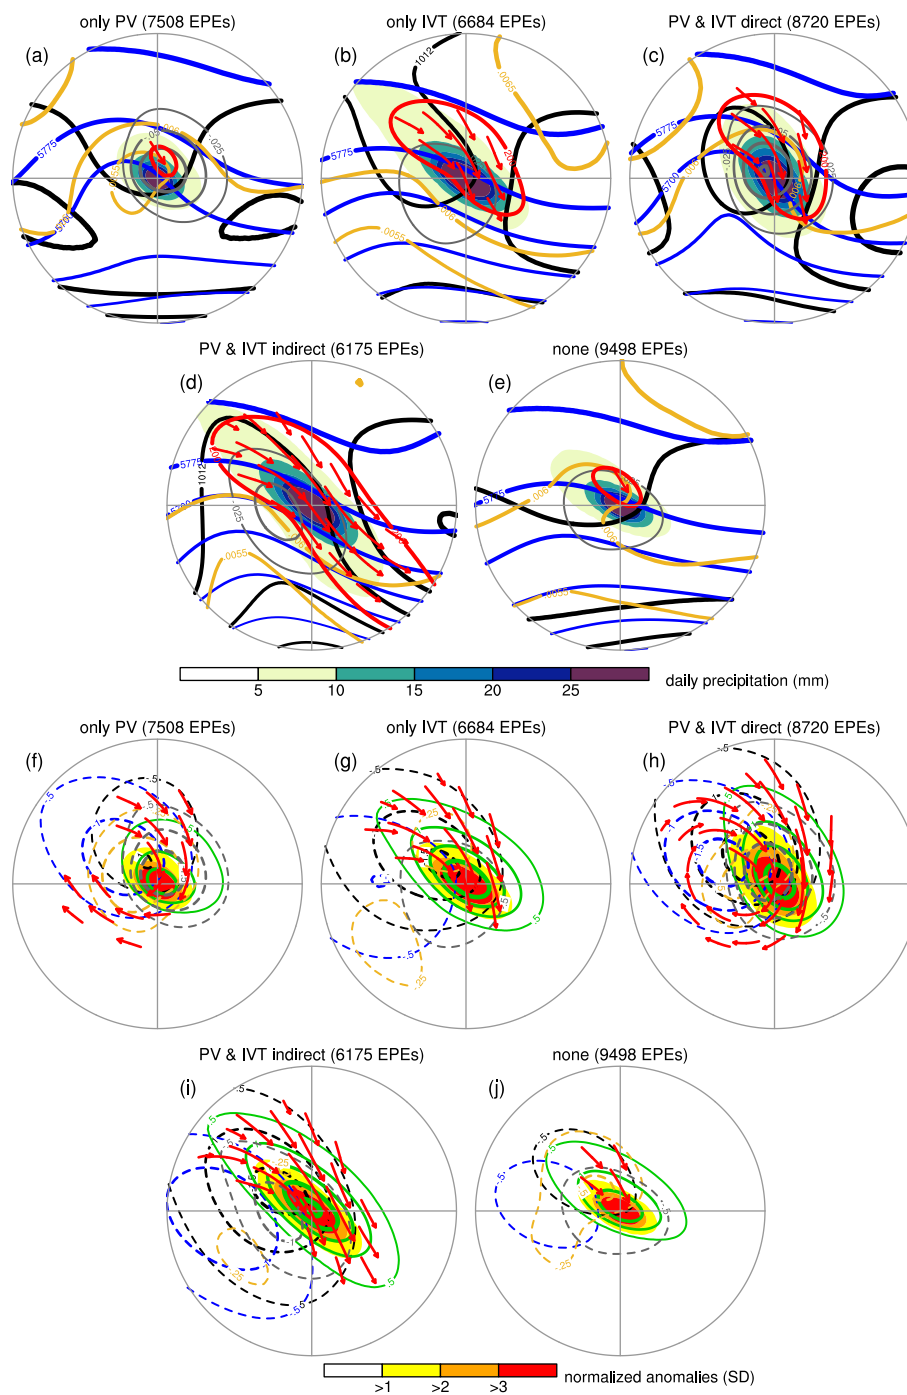

Figure S4. As Fig. 10, but for EPEs in the Southern Hemisphere over subtropical water.

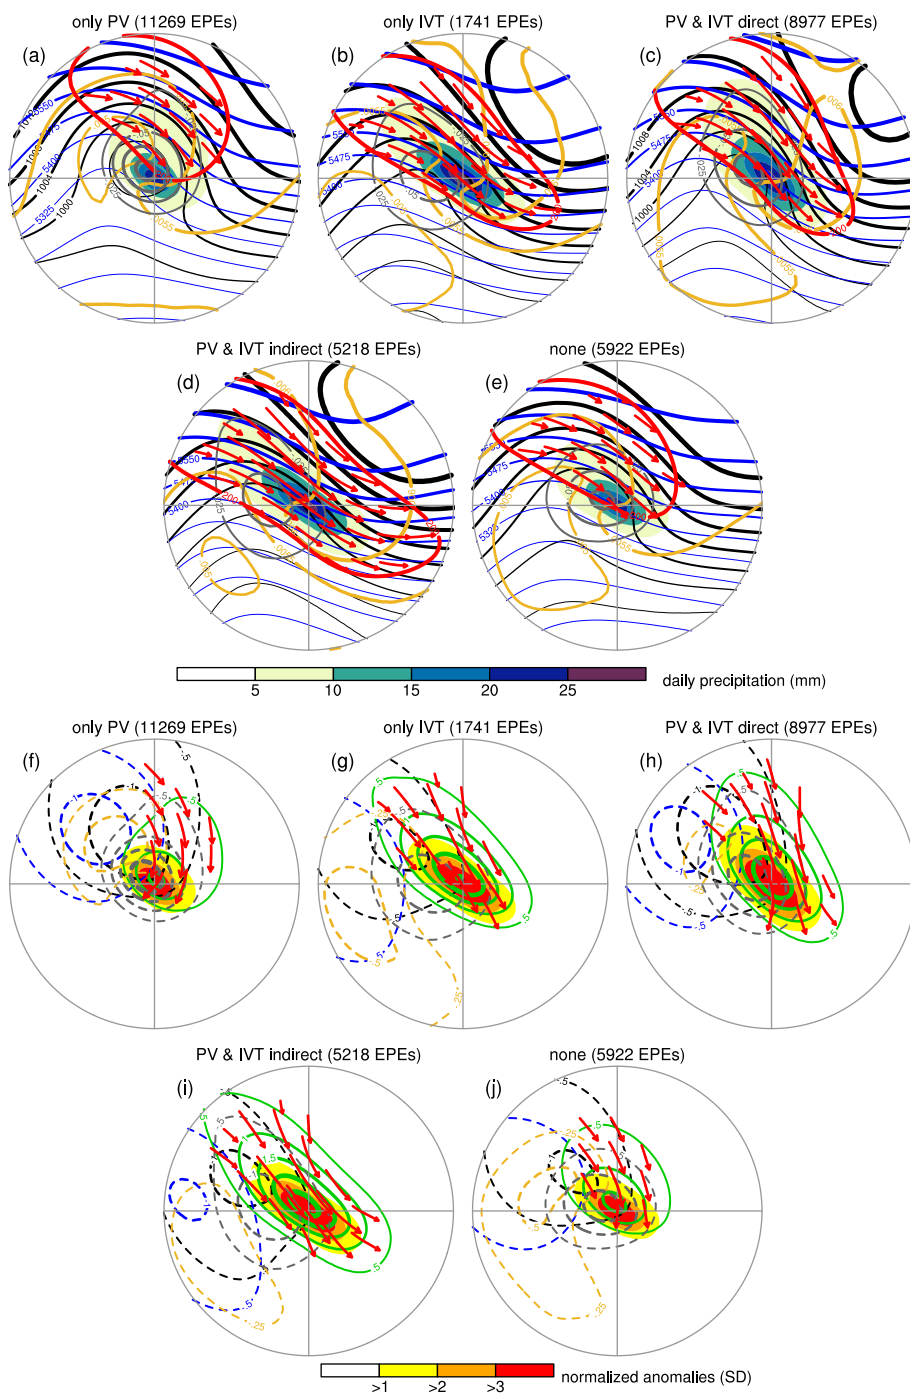

Figure S5. As Fig. 10, but for EPEs in the Southern Hemisphere over extratropical water.
