# Supplementary material for: A global climatological perspective on the importance of Rossby wave breaking and intense moisture transport for extreme precipitation events
Source: Copernicus journal article supplement (doi:10.5194/wcd-2020-44), 2020-09-17
Supplement: Supplementary file [file wcd-2020-44-RC2-supplement.pdf]

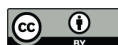

# A global climatological perspective on the importance of Rossby wave breaking and intense moisture transport for extreme precipitation events

Andries Jan de Vries<sup>1,2</sup>

5 <sup>1</sup>ETH Zürich, Institute for Atmospheric and Climate Science, Zurich, Switzerland

<sup>2</sup>Max Planck Institute for Chemistry, Atmospheric Chemistry Department, Mainz, Germany

*Correspondence to:* Andries Jan de Vries (andries.devries@env.ethz.ch)

**Abstract.** Extreme precipitation events (EPEs) cause frequently flooding with dramatic socioeconomic impacts in many parts of the world. Previous studies considered two synoptic-scale processes, Rossby wave breaking and intense moisture transport, typically in isolation, and their linkage to such EPEs in several regions. This study presents for the first time a global and systematic climatological analysis of these two synoptic-scale processes, in tandem and in isolation, for the occurrence of EPEs. To this end, we use 40-year ERA-Interim reanalysis data (1979-2018) and apply object-based identification methods for (i) daily EPEs, (ii) stratospheric potential vorticity (PV) streamers as indicators of Rossby wave breaking, and (iii) structures of high vertically integrated horizontal water vapor transport (IVT). First, the importance of these two processes is demonstrated by case studies of previously documented flood events that inflicted catastrophic impacts in different parts of the world. Next, a climatological quantification shows that Rossby wave breaking is associated with > 90 % of EPEs near high topography and over the Mediterranean, intense moisture transport is linked to > 90 % of EPEs over many coastal zones, and their combined occurrence contributes to > 70 % of EPEs in several subtropical and extratropical regions. A more detailed analysis shows that a majority of EPEs associated with (1) only Rossby wave breaking are confined to higher-latitude regions that are deprived from remote moisture supplies by high topography and deserts, (2) only intense moisture transport are found circumglobally at the outer tropics, associated with tropical cyclones, tropical easterly waves, and monsoon lows, (3) combined Rossby wave breaking and intense moisture transport dominate a large part of the globe, in particular over dry subtropical regions where tropical-extratropical interactions are of key relevance, (4) remote, far upstream Rossby wave breaking and intense moisture transport occur over mountainous extratropical west coasts, reminiscent of landfalling atmospheric rivers, and (5) neither of the two synoptic-scale processes are concentrated over the inner tropics and high topography at lower latitudes, where EPEs arise under the influence of local forcing. Accordingly, different combinations of wave breaking and intense moisture transport can reflect a large range of weather systems with relevance to EPEs across various climate zones. Furthermore, the relationship between the PV and IVT characteristics and the precipitation volumes shows that the strength of the wave breaking and moisture transport intensity are intimately connected with the extreme precipitation severity. Finally, composites reveal that subtropical and extratropical



EPEs, linked to Rossby wave breaking, go along with the formation of upper-level troughs and cyclogenetic processes near the surface downstream, reduced static stability beneath the upper-level forcing (only over water), and dynamical lifting ahead (over water and land). This study concludes with a concept that reconciles well-established meteorological principles with the importance of Rossby wave breaking and intense moisture transport for extreme precipitation events. The findings of this study may contribute to an improved understanding of the atmospheric processes that lead to EPEs, and may find application in climatic studies on extreme precipitation changes in a warming climate.

Keywords: heavy rainfall, flooding, potential vorticity, integrated vapor transport, extreme weather events, climatology, tropical-extratropical interactions, atmospheric rivers

## 1 Introduction

Extreme precipitation events (EPEs) frequently cause dramatic socioeconomic impacts in many parts of the world. They can induce flash floods, riverine floods, landslides, and debris flows, resulting in loss of life and damage to infrastructure and property (Ashley and Ashley, 2008; Barredo, 2007; Terti et al., 2017). For example, in the year 2017, floods were responsible for the largest share in fatalities (35 %) and affected people (60 %) due to natural disasters (EM-DAT, 2018). Records of the Emergency Events Database (EM-DAT, from the Centre for Research on the Epidemiology of Disasters, publicly available at <https://www.emdat.be>, assessed on 15 April 2020) indicate that floods left worldwide more than 275 million fatalities, affected almost 8 billion people through injuries or loss of homes, and caused a damage of about 8.9 trillion US dollars during the period of 1900-2019. These devastating societal impacts underline the importance of an improved understanding of the atmospheric processes that lead to the formation of EPEs.

Synoptic weather systems that drive EPEs vary across climate zones. In the tropics and lower latitudes, EPEs are typically associated with tropical cyclones (Khouakhi et al., 2017; Franco-Diaz et al., 2019), tropical easterly waves (Ladwig and Stensrud, 2009; Cretat et al., 2015), and monsoon lows/depressions (Hurley and Boos, 2015). Baroclinic systems dominate in extratropical regions, including extratropical cyclones, warm conveyor belts, and fronts (Hawcroft et al., 2012; Pfahl and Wernli, 2012; Catto and Pfahl, 2013; Papritz et al., 2014; Pfahl et al., 2014; Catto et al., 2015). Other well-known phenomena that predominantly affect higher latitude regions are tropical moisture exports (Knippertz and Wernli, 2010; Knippertz et al., 2013) and atmospheric rivers (Lavers and Villarini, 2013a,b; Waliser and Guan, 2017), whereas low-level jets are often found at lower latitudes (Chen and Yu, 1988; Monaghan et al., 2010). It is worth to point out here that these weather systems should not be interpreted as independent phenomena, but point to processes that are intertwined with another and share many similarities (Knippertz et al., 2013; Dacre et al., 2015, 2019).



Weather systems that can lead to EPEs in subtropical regions are much less well-known. Precipitation and heavy precipitation events in these typically dry regions have been associated with tropical plumes (Wright, 1997; Knippertz and Martin, 2005; Rubin et al., 2007), referring to elongated middle and upper-level cloud bands that reach from the tropics in a poleward and eastward direction (McGuirk et al., 1988). Other phenomena are bound to specific regions such as monsoon surges and moisture burst in southwestern North America, the southwestern slopes of the Himalaya's, and Australia (Favors and Abatzoglou, 2013; Martius et al., 2013; Pascale and Bordoni, 2016; Berry and Reeder, 2016; Vellore et al., 2016), tropical temperate troughs in southern Africa (Hart et al., 2013), and the active Red Sea Trough in the Middle East (Kahana et al., 2002; Krichak et al., 2012; De Vries et al., 2013). These weather systems typically involve tropical-extratropical interactions, whereby the extratropical forcing interacts with the tropical circulation through the intrusion of an upper-level trough into low latitudes (Knippertz, 2007; De Vries et al., 2018). As a result, a poleward incursion of tropical moisture reaches into the dry subtropics where it can support the formation of EPEs.

Several objective identification methods have been developed to detect and investigate these synoptic weather systems. For example, automated tools detect tropical plumes based on the geometry of cloud structures in satellite-based observations (Hart et al., 2012; Fröhlich et al., 2013). Eulerian approaches have been applied to reanalysis data and model output for the identification of extratropical cyclones based on minima in sea level pressure or maxima of low-tropospheric relative vorticity (Wernli and Schwierz, 2006; Neu et al., 2013), fronts inferred from changes in the horizontal wind direction or horizontal wet-bulb or equivalent potential temperature gradients in the lower troposphere (Berry et al., 2011; Simmonds et al., 2012; Schemm et al., 2015), and atmospheric rivers using vertically integrated tropospheric moisture content and/or moisture transport (see below). Lagrangian approaches served the detection of warm conveyor belts based on ascending air parcel trajectories (Eckhardt et al., 2004; Madonna et al., 2014) and tropical moisture exports defined by moist and poleward-moving air parcel trajectories (Knippertz and Wernli, 2010). A comprehensive overview of the identification and climatology of such Eulerian and Lagrangian flow features is presented by Sprenger et al. (2017).

Another meteorological process that has been associated with EPEs is Rossby wave breaking. This process refers to the non-linear phase of planetary wave amplification, which can result in irreversible mixing of air masses from stratospheric high-latitude origin into tropospheric low-latitude regions, and vice versa, as observed in early studies (McIntyre and Palmer, 1983; Appenzeller and Davies, 1992). In a potential vorticity (PV) framework, Rossby wave breaking can be diagnosed from the formation of elongated PV filaments, referred to as PV streamers, that eventually can split off from the main stratospheric (tropospheric) air reservoirs over the poles (tropics), known as cutoffs (Hoskins et al., 1985; Wernli and Sprenger, 2007; Portmann et al., 2020). Although these processes occur in the upper troposphere, they can also strongly affect the tropospheric circulation near the surface and result in surface weather extremes. Accordingly, many case studies

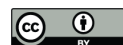

95 have linked Rossby wave breaking to EPEs in several regions, including, but not limited to, the Alpine region (Massacand et al., 1998), the Mediterranean (Argence et al., 2006; Portmann et al., 2019), northwest Africa (Knippertz and Martin, 2005), southern Africa (Hart et al., 2010), the Middle East (De Vries et al., 2016), Pakistan and the Himalaya's (Martius et al., 2013; Vellore et al., 2016), southwestern North America (Knippertz and Martin, 2007), and East Asia (Tsuiji and Takayabu, 2019). Systematic climatological analyses; however, based on PV streamers and/or cutoff lows, are limited to the Alpine  
100 region (Martius et al., 2006), the Middle East (De Vries et al., 2018), South Africa (Favre et al., 2013), and North America (Abatzoglou, 2016; Barbero et al., 2019; Moore et al., 2019). Therefore, it is not yet known in which other parts of the world and to what extent Rossby wave breaking is of high relevance to the formation of EPEs.

All aforementioned weather systems that have been associated with EPEs have at least one aspect in common; they drive  
105 intense moisture transport to the region of extreme precipitation. Moisture transport is often quantified in a Eulerian framework using vertically integrated horizontal water vapor transport (IVT), a diagnostic that became very popular during the last decade. For example, IVT has successfully served in numerous studies to identify so-called atmospheric rivers (e.g., Newell et al., 1992; Lavers et al., 2012; Guan and Waliser, 2015; Mundhenk et al., 2016a) that have been linked to precipitation extremes and flooding in many parts of the world, in particular the West Coast of North America and Western  
110 Europe (Ralph et al., 2004, 2006; Lavers et al., 2013a,b; Waliser and Guan, 2017). Also, IVT has been directly related to precipitation extremes (Moore et al., 2015; Froidevaux and Martius, 2016; Grazzini et al., 2019; Pohorsky et al., 2019; Stucki et al., 2020) and served as a proxy to elucidate moisture transport pathways that feed heavy rainfall events (Swales et al., 2016; Tan et al., 2019). Furthermore, recent studies employed IVT to improve the medium-range prediction of hydrometeorological extremes (Lavers et al., 2014, 2016) and to assess (thermo)dynamical changes of precipitation extremes  
115 in projected future climates (Lavers et al., 2015; Radic et al., 2015; Espinoza et al., 2018; Benedict et al., 2019; Hsu and Chen, 2020; Sousa et al., 2020). For extensive reviews on the link between intense moisture transport and EPEs, the reader is referred to Gimeno et al. (2016) and Liu et al. (2020).

Although the focus on intense moisture transport and the use of IVT is very prominent in studies of extreme precipitation,  
120 the precise connection between the driving synoptic processes and the generation of extreme precipitation often remains more in the background and less understood. Few studies combined the use of PV and IVT, and linked Rossby wave breaking to moist air incursions into the Arctic (Liu and Barnes, 2015), and to the formation and landfall of atmospheric rivers (Payne and Magnusdottir, 2014, 2016; Hu et al., 2017). Several extreme precipitation-related studies took Rossby wave breaking as a starting point, and linked this process to enhanced moisture transport (Martius et al., 2006; Ryoo et al.,  
125 2013; Moore et al., 2019), whereas others took the perspective of moisture transport, and identified some form of upper-level forcing in the shape of upper-level troughs and/or cutoffs upstream, suggesting the occurrence of Rossby wave breaking (e.g., Neiman et al., 2008; Ralph et al., 2011; Mundhenk et al., 2016b). So far, however, a systematic evaluation of the



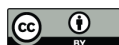

individual and combined importance of Rossby wave breaking and intense moisture transport for EPEs is limited to the Middle East region (De Vries et al., 2018) and remains unexplored at the global scale.

This study presents for the first time a global and systematic climatological analysis of the individual and combined importance of Rossby wave breaking and intense moisture transport for EPEs. The motivations for this approach are threefold: (1) previous studies that linked Rossby wave breaking to EPEs were confined to specific regions and are here complemented by a global analysis, (2) the combined application of PV and IVT flow features represent key larger-scale dynamic and thermodynamic processes that can lead to the formation of EPEs, and (3) this setup facilitates a process-based evaluation of the individual and combined importance of these two synoptic processes for the occurrence of EPEs in different regions. Note that the focus of this study is primarily on the synoptic-scale processes that shape the tropospheric environment in which these EPEs occur, whereas mesoscale processes that determine the precise timing, location and organization of convective storms are beyond the scope of this work.

This study addresses the following three research questions:

- 1) How often and where are EPEs linked to Rossby wave breaking, intense moisture transport, and their combined occurrence?
- 2) How do the characteristics of these two synoptic-scale processes relate to the extreme precipitation severity?
- 3) How do the tropospheric environments (e.g., forcing mechanism of upward motion) contribute to the formation of EPEs in different regions and for different constellations of the two synoptic-scale processes?

To this end, we use reanalysis data and apply state-of-the-art object-based identification methods for (i) daily EPEs, (ii) stratospheric PV streamers as indicators of Rossby wave breaking, and (iii) structures of high IVT that represent intense moisture transport (Fig. 1). We qualitatively demonstrate the importance of these two synoptic processes for EPEs with several infamous flood events in different parts of the world that were documented in previous case studies, and then proceed with a climatological quantification at the global scale. First, we explore the geographical distribution of EPEs that are linked to the separate and combined occurrence of Rossby wave breaking and intense moisture transport. Next, we relate the strength of the wave breaking and the intensity of the moisture transport to the extreme precipitation severity. Furthermore, we use composites to elucidate the tropospheric environments and forcing mechanism for ascent that contribute to the formation of EPEs in different regions, and for different constellations of PV streamers and IVT structures that coincide with the EPEs. These processes are then summarized in a concept that reconciles longstanding meteorological principles with the importance of Rossby wave breaking and intense moisture transport for extreme precipitation events. The findings of this study also form the basis for a new classification of EPE related weather regimes that reflect a large range of relevant weather systems across different climate zones. This new view on the atmospheric processes of EPEs can have large

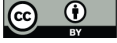

implications and potential for the predictability of precipitation extremes and opens up new avenues to study their changes in a warming climate.

The organization of the paper is as follows. The reanalysis data and object-based identification methods are described in section 2. Section 3 presents illustrative case studies. Section 4 presents the climatology of Rossby wave breaking and intense moisture transport, and then links these processes to EPEs. Section 5 elaborates on the relationship between the extreme precipitation severity and the characteristics of the PV and IVT structures. Section 6 uses composites of the tropospheric circulation to elucidate the relevant meteorological processes that contribute to the formation of EPEs. Finally, section 7 presents a synthesis, followed by the conclusions in section 8.

## 2. Methods and data

### 2.1 Reanalysis data and key diagnostics

We use the ERA-Interim reanalysis dataset from the European Centre for Medium-range Weather Forecasts (ECWMF) for the identification of daily EPEs, stratospheric PV streamers, and structures of high IVT. The reanalysis dataset provides a best estimate of the global atmospheric state based on a forecast model integration with the Integrated Forecast System (IFS, release Cy31r2) and the assimilation of several observation types (Dee et al., 2011). The ERA-Interim data is used on its native N128 Gaussian grid (512 and 256 grid points in longitudinal and meridional directions, respectively), 60 model levels and 37 pressure levels in the vertical direction, and 6-hourly time intervals for a 40-year period from 1979 to 2018.

Over the last decades, PV has proven to be invaluable in the field of dynamical meteorology. PV is materially conserved under adiabatic and frictionless conditions and contains the full information of a balanced flow, based on the so-called “PV invertibility” principle (Hoskins et al., 1985). These properties qualify PV as very useful for studying meteorological processes at synoptic scales such as Rossby wave breaking. PV is proportional to the scalar product of absolute vorticity  $\zeta_a$  and the gradient of potential temperature  $\theta$

$$PV = \rho^{-1} \zeta_a \cdot \nabla \theta, \quad (1)$$

where  $\rho$  is the density. We compute PV using the wind and temperature on model levels and surface pressure, and then interpolate the PV fields onto isentropic surfaces between 300 and 350 K with 5 K intervals.

IVT quantifies the horizontal atmospheric moisture transport in a Eulerian framework, and this vector is defined by (Newell et al., 1992)

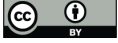

$$\mathbf{IVT} = g^{-1} \int_{p_{\text{bottom}}}^{p_{\text{top}}} q \mathbf{v} dp, \quad (2)$$

195 where  $g$  is the gravitational acceleration,  $q$  the specific humidity,  $\mathbf{v}$  the horizontal wind, and  $p$  pressure. The zonal and meridional components of this vector are readily available in the ERA-Interim dataset (Berrisford et al., 2011), and the IVT magnitude follows from

$$IVT = \sqrt{IVT_{\text{zonal}}^2 + IVT_{\text{meridional}}^2}. \quad (3)$$

200

Furthermore, we adopt several other diagnostics to study the larger-scale meteorological environment in which the EPEs develop, including the atmospheric moisture content, static stability, and quasi-geostrophic vertical motion. The atmospheric moisture content, also known to as total column water (TCW) or precipitable water, provides the necessary fuel for precipitation generation and is defined by

205

$$TCW = \frac{1}{g} \int_{p_{\text{bottom}}}^{p_{\text{top}}} q dp \quad (4)$$

and is also readily available in the ERA-Interim reanalysis dataset.

210 Synoptic-scale processes, such as upper-level PV anomalies, can reduce the tropospheric stratification beneath the anomaly, and can thus favor convective overturning if the static stability is sufficiently reduced and some form of initial lifting is provided (Doswell, 1996; Funatsu and Waugh, 2008; Schlemmer et al., 2010). Static stability can be expressed in several forms (Gates, 1960). We follow the approach of Funatsu and Waugh (2008), and compute static stability as

$$215 \quad S = -g \frac{\partial \theta}{\partial p} \quad (5)$$

between the 850 and 500 hPa pressure levels, which represents the stratification of the lower-troposphere.

Several case studies (Knippertz and Martin, 2005; Hart et al., 2010; Martius et al., 2013; De Vries et al., 2016) and climatological analyses (Agel et al., 2019; Moore et al., 2019; Nie and Fan, 2019; Dai and Nie, 2020) found that EPEs occur  
 220 in regions where the quasi-geostrophic (QG) forcing for ascent is enhanced. QG ascent, also often referred to as dynamical lifting, large-scale ascent, or balanced ascent, can be quantified through inversion of the QG omega equation in the Q-vector form (Hoskins et al., 1978; Davies, 2015)

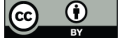

$$225 \quad \left( \sigma \nabla^2 + f^2 \frac{\partial^2}{\partial p^2} \right) \omega = -2 \nabla \cdot \mathbf{Q} \quad (6)$$

with

$$\mathbf{Q} = \frac{R_d}{p_0} \left( \frac{p}{p_0} \right)^{\frac{R_d}{c_p}} \left[ \left( \frac{\partial \mathbf{v}_g}{\partial x} \cdot \nabla \theta \right), \left( \frac{\partial \mathbf{v}_g}{\partial y} \cdot \nabla \theta \right) \right] \quad (7)$$

and

$$\sigma = - \frac{R_d T_v}{p \theta} \frac{\partial \theta}{\partial p}, \quad (8)$$

230

where  $\omega$  is omega,  $f$  the planetary vorticity,  $\mathbf{v}_g$  the geostrophic wind,  $R_d$  the gas constant of dry air,  $c_p$  the specific heat of dry air at constant pressure, and  $T_v$  the virtual temperature. The QG vertical motion can be decomposed in contributions due to the forcing by the upper and lower tropospheric circulations, respectively. Here, as in Graf et al. (2017) and Crespo et al. (2020), we use the QG vertical motion attributed to the upper-tropospheric circulation ( $< 600$  hPa) with the specific purpose

235 to quantify the contribution of the upper-level forcing to the QG ascent in the regions of EPEs.

## 2.2 Extreme precipitation objects

Previous studies adopted various approaches and criteria for the identification of precipitation extremes. Common criteria, applied to daily or multiple-day precipitation amounts, are (i) absolute thresholds, (ii) percentile-based thresholds, and (iii) monthly or annual maxima (Zhang et al., 2011; Barlow et al., 2019). Also, with regard to their spatial characteristics, several

240 approaches have been used to define extremes, including (1) individual grid points (e.g., Pfahl and Wernli, 2012), (2) area averages for specific regions of interest (Martius et al., 2006; De Vries et al., 2018), (3) spatially smoothed fields using a spatially-moving average within a defined radius (Skok et al., 2009; Raveh-Rubin and Wernli, 2015), and (4) spatially coherent objects that consists of multiple co-located extreme precipitation grid points (Moore et al., 2015, 2019; Mahoney et al., 2016).

245

In this study, we define daily EPEs as objects consisting of grid points that exceed a percentile-based threshold and that are located within a certain distance of another. This procedure consists of the following four steps, as demonstrated in Fig. 2 for a few EPEs that will be discussed in section 3. First, daily precipitation sums are constructed from 12 h forecasts from 00 and 12 UTC (Fig. 2a-d). Next, extreme precipitation is defined by grid points that exceed the annual 99<sup>th</sup> percentile of daily

250 precipitation during the period of 1979-2018 (Fig. 2e-h). Then, all extreme precipitation grid points within a radius of 250 km are connected with another to obtain spatially coherent objects. Objects with a surface area  $< 50,000$  km<sup>2</sup> are removed from the selection to focus on those events with impacts on larger spatial scales (Fig. 2i-l). Finally, characteristics of the remaining objects are retrieved, such as the total precipitation volume and the mass-weighted centre (Fig. 2m-o).

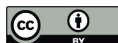

255 The choice to use reanalysis data for defining extreme precipitation objects has several advantages, but also few limitations  
 that deserve some consideration. Precipitation in the ERA-Interim reanalysis is a forecasted quantity and not directly  
 constrained by observations in the data assimilation procedure. In this regard, precipitation may be interpreted as a modeling  
 product with inherent uncertainties, rather than actual observed precipitation. Furthermore, as a result of a relatively coarse  
 model resolution, reanalysis precipitation typically exhibits larger spatial patterns with longer durations and lower rainfall  
 260 intensities as compared to precipitation in high-resolution observational products (Donat et al., 2014; White et al., 2017).  
 Observational precipitation products; however, are subject to several other limitations. Rain gauge measurements, and  
 gridded datasets based on these measurements, are confined to land areas, suffer from regions with a low-density station  
 network, and can have inhomogeneous time series (e.g., Donat et al., 2014; Sun et al., 2017). Satellite-based estimates  
 depend on algorithm retrievals with relatively large uncertainties over (semi)arid regions and high topography (Dinku et al.,  
 265 2011; Zambrano-Bigiarini et al., 2017), typically span relatively short periods from 1998 onwards, and cover predominantly  
 tropical and subtropical regions (Sun et al., 2017). The use of precipitation from reanalysis data has the highly desired  
 advantage of a full spatial and temporal coverage, which facilitates a worldwide assessment of the link between EPEs and  
 synoptic-scale processes for an extensive 40-year period. Moreover, the shortcomings of reanalysis precipitation have only a  
 limited influence on our EPEs as they are based on normalized fields that generally show a better comparison to those in  
 270 other data product types than actual values (Donat et al., 2014), and are defined by relatively large spatiotemporal scales  
 (daily,  $> 50.000 \text{ km}^2$ ) that makes the EPE objects less sensitive to the highly variable nature of precipitation.

### 2.3 Stratospheric PV streamers

Previous studies have followed two different approaches for detecting PV structures as indicators of Rossby wave breaking.  
 One approach is based on the meridional reversal of the PV gradient on an isentropic surface (Postel and Hitchman, 1999).  
 275 Similarly, Strong and Magnusdottir (2008) used meridionally overturning PV contours, which found application in  
 aforementioned studies that linked Rossby wave breaking to landfalling atmospheric rivers (Payne and Magnusdottir, 2014,  
 2016; Mundhenk et al., 2016b; Hu et al., 2017). Another method, introduced by Wernli and Sprenger (2007), searches for an  
 elongated shape of PV contours, referred to as PV streamers, often leading to so-called PV cutoffs when these structures split  
 off from the main PV reservoir. This approach was refined in Sprenger et al. (2013) and adopted in several studies that  
 280 linked Rossby wave breaking to EPEs in the Alpine region, the Middle East, and North America (Martius et al., 2006; De  
 Vries et al., 2018; Moore et al., 2019). In this study, we apply the algorithm from De Vries et al. (2018), that follows the  
 approach of Wernli and Sprenger (2007), to both hemispheres. For the sake of clarity and completeness, we describe the  
 algorithm briefly, with special emphasis on some new aspects and modifications performed for this study.

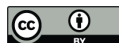

285 For the identification of stratospheric PV streamers, we use  $\pm 2$  potential vorticity unit (PVU;  $1 \text{ PVU} = 10^{-6} \text{ K kg}^{-1} \text{ m}^2 \text{ s}^{-1}$ ) contours on isentropic surfaces between 300 and 350 K with 5 K intervals. The  $|2 \text{ PVU}|$  surface, hereafter written as 2 PVU, is usually considered as the dynamical tropopause, which adequately reflects transient upper-tropospheric disturbances. In a first stage, we define the stratospheric body in each hemisphere by the most equatorward 2 PVU contour that encircles the pole. If such a contour does not exist, we appoint the longest 2 PVU contour as stratospheric body, provided that this contour  
 290 extends over more than 180 degrees in the zonal direction and reaches at least partly poleward of  $80^\circ$  latitude. This study only considers stratospheric PV streamers ( $\text{PV} > 2 \text{ PVU}$ ) and ignores their tropospheric counterparts.

In a second stage, we evaluate for each pair of contour points on the 2 PVU contour that demarcates the stratospheric body if the (1) width  $W < 1500 \text{ km}$ , (2) the length  $L > 1000 \text{ km}$ , and (3) their ratio  $r = L/W > 1$ , see also the schematic in Fig. 1. If all  
 295 three criteria are satisfied, then the surface between the two contour points A and B and the corresponding contour segment is considered as a PV streamer. The distances  $W$  and  $L$  are measured by the great-circle distances between points A and B, and C and D, respectively (Fig. 1). The chosen geometrical criteria are the strictest in the sensitivity tests of De Vries et al. (2018) and intend to limit the detection of PV streamers to those that exhibit a very elongated form. If more than 50 % of the stratospheric body is covered by stratospheric streamers, all PV streamers are removed at that particular time instance and  
 300 isentropic surface for that hemisphere, assuming that the 2 PVU contour is too distorted to realistically represent the dynamical tropopause. A further screening removes all PV streamers with a surface area  $< 100,000 \text{ km}^2$  to retain only structures with relevance to the larger-scale circulation. Our methodology does not distinguish between anticyclonic and cyclonic wave breaking (Martius et al., 2007), which is considered of secondary importance as both types of wave breaking can be associated with precipitation extremes (Ryoo et al., 2013; Hu et al., 2017; Moore et al., 2019). Figure 3 demonstrates  
 305 the functionality of the algorithm with PV on the 335 K isentrope in the upper panel and the identified PV streamers in the lower panel.

In a last stage, we assign to each PV streamer an extended area of influence to facilitate the matching of PV streamers with EPEs. Previous studies showed that extreme precipitation typically forms downstream of upper-level PV anomalies (e.g.,  
 310 Martius et al., 2006; De Vries et al., 2018; Moore et al., 2019). This motivates the use of such an extended area of influence, which is also in line with the notion that PV “acts” at a distance, or in other words, that the atmospheric flow “feels” a remote PV anomaly (Hoskins et al., 1985). We adopt a relatively simple and straightforward geometrical approach to define this extended area. All nearby grid points, within a radius  $R$  of any grid point that is part of the PV streamer, are assigned to the extended area of this specific PV streamer (light blue shading in Figs. 1 and 3b). This radius  $R$  is variable and  
 315 proportional to the surface area of the PV streamer, and computed as follows. We determine the equivalent radius  $R_{eqv}$  of the PV streamer, assuming a circular shape, and then retrieve the extension of  $R_{eqv}$  needed to double the PV surface under a





maintained circular shape ( $R = 0.414R_{eqv}$ ). Hereafter, we refer to the PV streamers with their extended areas as PV structures.

## 2.4 IVT structures

Moisture transport is typically very large over tropical and extratropical oceans where easterly trade winds and the storm tracks dominate. To avoid very frequent and extraordinarily large IVT structures over these regions, we use two alternative forms of IVT instead of full IVT fields: (1) filtered IVT whereby the 91-day running mean is subtracted from the full IVT ( $IVT_{filt}$ ), and (2) IVT fields that only consider IVT values that exceed the annual 95<sup>th</sup> percentile of daily mean IVT, based on the period of 1979-2018 ( $IVT_{pct}$ ). The first form removes the seasonality of IVT and the second form focuses on unusually high IVT. Thus, both forms aim to detect transient structures of high IVT with respect to a varying background IVT. We identify IVT structures by applying a static threshold of  $150 \text{ kg m}^{-1} \text{ s}^{-1}$  on  $IVT_{filt}$  and of  $200 \text{ kg m}^{-1} \text{ s}^{-1}$  on  $IVT_{pct}$ , of which the latter provides a lower limit on the 95<sup>th</sup> percentile fields. We discuss both types of IVT structures in the first part of our analysis since they have substantially different climatologies, as will be shown in section 4.

Similar to the PV streamers, we only retain IVT structures with a surface area  $> 100,000 \text{ km}^2$  to focus on synoptic-scale structures. Furthermore, the maximum IVT value within the IVT structures is assigned as a characteristic to these structures as to provide a measure of the moisture transport intensity. Finally, each IVT structure is provided with an extended area (light green colours in Fig. 3b), in the same manner as for the PV structures, to facilitate the matching of remote PV structures with the extreme precipitation objects, as further detailed in section 4. Figure 3 provides an example of an IVT field and the identification of IVT structures in the  $IVT_{pct}$  form.

Our identification method for IVT structures is very similar to the approach used in several studies to identify atmospheric rivers, with the notable exception that we do not impose any specific geometrical criteria in terms of the length, width, and length-width ratio (e.g., Guan and Waliser, 2015; Mundhenk et al., 2016a). Our rationale is that structures with high IVT can potentially be relevant to extreme precipitation independent of their specific form. To provide further context for our choice of IVT structures, we briefly list different definitions of atmospheric rivers applied in previous studies. These include (1) full IVT fields with static thresholds ranging between  $250$  and  $500 \text{ kg m}^{-1} \text{ s}^{-1}$  (Rutz et al., 2014; Mahoney et al., 2016; Pasquier et al., 2018), (2) anomalous IVT fields whereby the lowest frequency harmonics are removed to obtain structures of high anomalous IVT, for example, using a static threshold of  $250 \text{ kg m}^{-1} \text{ s}^{-1}$  (Mundhenk et al., 2016a), (3) percentile-based thresholds, typically the 85<sup>th</sup> percentile, on global fields with a lower limit of  $100 \text{ kg m}^{-1} \text{ s}^{-1}$  (Guan and Waliser, 2015), or over coastlines where atmospheric rivers make landfall (Lavers et al., 2012; Ramos et al., 2015). In this regard, our two forms of IVT,  $IVT_{filt}$  and  $IVT_{pct}$ , are very similar to, and inspired by the aforementioned second and third methods to identify atmospheric rivers, respectively.

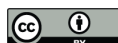

## 2.5 Matching of EPEs with Rossby wave breaking and intense moisture transport

In this study, we connect EPEs with Rossby wave breaking and intense moisture transport in two different ways (Table 1). One method adopts a so-called “inclusive” matching approach, used in section 4.2, whereby EPEs can be assigned to multiple categories of PV and/or IVT structures to quantify the global contribution of the separate and combined synoptic processes to EPEs. Another method follows an “exclusive” matching approach, used in sections 6.2 and 7, with the aim to isolate the different constellations of synoptic processes that can be linked to EPEs to evaluate their geographical preference and influence on the extreme precipitation severity. For both approaches, the matching of EPEs with synoptic-scale structures is defined as follows. Daily extreme precipitation objects match with the PV and/or IVT structures if they spatially overlap the extreme precipitation object with at least one grid point for at least three of the four 6-hourly time instances of the day. Furthermore, for PV structures, the multiple matches per day need to occur on the same isentrope, which has the intention to exclude ‘random’ matches of PV structures on different isentropes that are related to different weather systems, following the approach of De Vries et al. (2018). Matches of combined PV and IVT structures are allowed to occur at different time intervals of the day as long as both occur for at least three time instances of the day.

Fractions of the “inclusive” matching approach are evaluated on their statistical significance using a Monte Carlo test. We performed the matching of the objects for 1000 sets whereby the dates of EPEs are retained as in reality, and dates of PV and IVT structures are shuffled through selecting a random day within the same month of another year. This selection procedure removes potential sensitivities of the test to a strong seasonal influence, and provides at the same time a large sample of random days.

## 3 Example cases of extreme precipitation and flooding

We demonstrate the importance of Rossby wave breaking and intense moisture transport for EPEs using a selection of twelve events that have been the subject of previous case studies (Table 2). All twelve events resulted in flooding, and most of them led to immense catastrophic societal and economic impacts. Records of EM-DAT, also provided in Table 2, estimate that several of these events resulted in a dozen up to thousands of fatalities and an estimated damage in the order of billions US dollars. These infamous flooding events include the great Colorado floods in September 2013 (Gochis et al., 2015; Eden et al., 2016), the Jeddah flooding of November 2009 in the Middle East (Haggag and El-Badry, 2013; De Vries et al., 2016), the July 2010 Pakistan floods (Hong et al., 2011; Martius et al., 2013), the Atacama Desert floods in March 2015 (Wilcox et al., 2015; Bozkurt et al., 2016), and the September 1987 Natal floods in South Africa (Triegeardt et al., 1988; Heerden and Taljaard, 1998). It should be noted here, that the dates of the EPEs, as listed in Table 2, are as mentioned in the cited case studies, while the periods of the flood events and attributed socioeconomic impacts from the EM-DAT records can cover much longer periods. For example, the EPE in India occurred on 17-18 June 2013 (Joseph et al., 2015; Vellore et al., 2016),

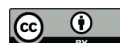

380 whereas the 6,054 fatalities attributed to the flood were reported for the period of 12-27 June across several provinces of India in the EM-DAT database. Thus, it is not guaranteed that all listed socioeconomic impacts in Table 2 exclusively stem from the EPE events under discussion.

385 All twelve cases clearly demonstrate the presence of a stratospheric PV streamer and an IVT structure on its downstream flank that overlaps the extreme precipitation objects (Fig. 4). Most of these events depict a southwest-northeastward (northwest-southeastward for events in the Southern Hemisphere) orientation of the PV streamer, which is typical of anticyclonic Rossby wave breaking that follows the LC1 baroclinic wave life cycle of Thorncroft et al. (1993). Likely, this type of wave breaking is very prominent in our selection of events as most of them took place in subtropical regions, which are predominantly affected by “equatorward” Rossby wave breaking that is characterized by a backward-tilting and thinning  
 390 upper-level trough that moves equatorward (Thorncroft et al., 1993).

Interestingly, these cases also depict two different constellations of the positioning of the PV streamers with respect to the EPEs. For most cases, the PV structures directly overlap a part of the extreme precipitation objects, as for example for the events over North America, northwest Africa, the Alpine region, the Atacama Desert, and southern Africa (Fig.  
 395 4a,b,c,d,h,j,k). For few other cases, the PV structures are positioned farther away and do not directly overlap the extreme precipitation object, although they connect indirectly with the extreme precipitation objects through overlap with the IVT structures’ extended area (Fig. 4e,f,g). These two different constellations imply that Rossby wave breaking and the associated upper-level forcing can initiate heavy rainfall through (1) solely steering the moist air flow toward the region of extreme precipitation, as for the latter mentioned cases, and (2) in addition to moisture transport also providing some form of  
 400 forcing for upward motion, as for the former mentioned cases.

## 4 Climatology

### 4.1 Rossby wave breaking and intense moisture transport

We now shift our focus from case studies to a climatological analysis for the ERA-Interim period of 1979-2018. Before addressing the link between EPEs and the synoptic-scale processes of interest, we briefly examine the climatology of Rossby  
 405 wave breaking and intense moisture transport as to provide a climatological context for these synoptic-scale processes. Figure 5a-c depict occurrence frequencies of stratospheric PV streamers and IVT structures. Previous studies have shown climatological frequencies of stratospheric PV streamers on single isentropic surfaces based on ERA-15 and ERA-40 reanalyses (Wernli and Sprenger, 2007; Martius et al., 2007). Here, we show the global ERA-Interim climatology of stratospheric PV streamers across multiple isentropes to account for the strong seasonal and latitudinal variability of the  
 410 isentropic surfaces on which these structures preferentially appear (Röthlisberger et al., 2018). Figure 5a displays vertically



aggregated fields whereby PV streamers are only counted once if they occur on multiple isentropes at a particular time step and grid point. The climatology of IVT structure frequencies is shown in Fig. 5b and Fig. 5d for the  $IVT_{filt}$  and  $IVT_{pct}$  forms, respectively, and Fig. 5c shows the IVT values that correspond to the annual 95<sup>th</sup> percentile, used as threshold for identification of  $IVT_{pct}$  structures.

415

Stratospheric PV streamers occur predominantly in the extratropics, and reduce towards the tropics and poles. They reach highest frequencies (1) over the West and East Coasts of North America, (2) the Mediterranean and southern Europe, (3) across the southern part of South America, (4) along the southern Australian coast extending in an eastward direction across New Zealand and a large part of the South Pacific, and (5) to a lesser extent near the South African coast. Values reach over 32 % in most of these regions and exceed 40 % in the Mediterranean (Fig. 5a). Interestingly, PV streamers appear relatively frequent in coastal regions near high topography, including the Rocky Mountains, the Andes, the southern African and Australian coasts, and New Zealand.

425

Intense moisture transport, expressed in the  $IVT_{filt}$  form, occurs predominantly over extratropical and tropical oceans, where storm tracks and tropical easterlies dominate (Fig. 5b). Furthermore, the climatology reflects the presence of well-known low-level jets, including those over the Great Plains in the USA, South America along the Andes, and the Caribbean (Gimeno et al., 2016).  $IVT_{filt}$  structures are rarest over the polar regions and high topography where IVT is typically very low, and over the subtropical eastern Pacific and Atlantic Oceans where semi-permanent subtropical anticyclones dominate. Switching focus to the  $IVT_{pct}$  form, the annual 95<sup>th</sup> percentile of IVT values ranges from  $< 50 \text{ kg m}^{-1} \text{ s}^{-1}$  in polar regions up to  $> 850 \text{ kg m}^{-1} \text{ s}^{-1}$  over the western North Pacific (Fig. 5c).  $IVT_{pct}$  frequencies are by design near 5 %, except in regions where the 95<sup>th</sup> percentile remains below the lower limit of  $200 \text{ kg m}^{-1} \text{ s}^{-1}$ , that is, over polar regions and elevated topography, i.e., the Rocky Mountains, the Andes, the Himalaya's, the Ethiopian Highlands, Greenland and Antarctica (Fig. 5d). Note, that small IVT structures  $< 100,000 \text{ km}^2$  are removed, and that therefore fractions of  $IVT_{pct}$  structures remain typically slightly below 5 %.

430

## 435 4.2 EPEs linked to Rossby wave breaking and intense moisture transport

440

In this section, we connect extreme precipitation objects with (1) PV structures, (2) IVT structures, (3) combined PV and IVT structures with a direct influence of the PV structures, and (4) combined PV and IVT structures, whereby also an indirect influence of the PV structures is allowed. More specifically, the direct PV influence of category (3) requires the PV structure to have a direct overlap with the extreme precipitation object, whereas for category (4) the PV structure is also allowed to connect with the extreme precipitation object through overlap with the IVT structures' extended area, provided that the IVT structure itself overlaps the extreme precipitation object. Examples of categories (3) and (4) were given by the two types of cases discussed in section 3, and are also exemplified in Fig. 3 by EPEs over the Middle East and the US West



Coast, respectively. Figure 6 presents the fractions of the extreme precipitation objects that match with the PV and/or IVT structures for the four described categories, with the stippling indicating where these values are statistically significant at the 95 % level based on the Monte Carlo test. In the following **discussing**, we focus primarily on IVT structures in the IVT<sub>pct</sub> form as this form shows a particularly high importance for EPEs over land, in contrast to the IVT<sub>fil</sub> form that has a relatively high relevance to EPEs over the large ocean basins (Fig. S1).

PV structures are frequently associated with EPEs over subtropical and extratropical regions (Fig. 6a). This association reduces substantially toward the poles and is negligible over the tropics. More specifically, regions where EPEs are strongly and significantly linked to PV structures include (1) southwestern North America and the adjacent eastern Pacific upstream of the Rocky Mountains at subtropical latitudes, and central North America downstream of the Rocky Mountains at extratropical latitudes extending across the North Atlantic, (2) the entire Mediterranean Basin and surrounding regions, including the eastern Atlantic, North Africa, southern and eastern Europe, and a large part of the Middle East, and (3) portions of Northeast Asia, north of the Himalaya's and over the Sea of Okhotsk. In the Southern Hemisphere, we find (4) the subtropical eastern Pacific and the western fringes of South America upstream of the Andes, and the extratropical part of South America downstream of the Andes, (5) across the southern African coast and adjacent seas, (6) the southern margins of the Australian continent, and (7) the Southern Ocean around the Antarctic continent. Fractions of EPEs that co-occur with PV structures exceed 80 % in all these regions, and reach over 90 % in parts of the Mediterranean and central North America. Interestingly, EPEs linked to PV structures also show a statistically significant fractions over the core polar regions where their values remain relatively low, in contrast to high values of EPE fractions over much of the extratropics that remain statistically insignificant. **This implies that very frequent Rossby wave breaking in extratropical storm track regions are not a decisive factor for EPE formation in these regions, whereas infrequent Rossby wave breaking poleward and equatorward of the extratropical storm track, over polar and subtropical regions, contribute significantly to EPEs.** Specific regions that were addressed in previous case and climatological studies also clearly show up as important regions where Rossby wave breaking is relevant for EPEs; southwestern and central North America, the southern Alps, the Middle East, the western Himalaya's and Pakistan, northern Chile, and southern Africa (Massacand et al., 1998; Martius et al., 2006; Knippertz and Martin, 2007; Hart et al., 2010; Martius et al., 2013; Bozkurt et al., 2016; De Vries et al., 2016, 2018; Vellore et al., 2016; Moore et al., 2019). These regions are characterized by high topographic plateaus and mountain ranges, supporting a previously proposed mechanism through which PV streamers force and orient the low-tropospheric moist air flow towards a topographic barrier, supporting the formation of heavy rainfall (Schlemmer et al., 2010).

Intense moisture transport is particularly important for EPEs over coastal regions where vast oceans border continental land such as (1) the entire West Coast of North America, (2) eastern North America, stretching from the Caribbean to the southwestern margins of Greenland, (3) northwest Africa and parts of Western Europe, including the western Iberian



Peninsula, (4) large parts of the East Asian coast that border the Pacific, (5) the southwestern and southeastern coastal zones of South America (Fig. 6b). Many of these coastal regions have also been identified as hotspots where atmospheric rivers bring heavy rainfall and flooding (Ralph et al., 2006; Lavers et al., 2013a; Guan and Waliser, 2015; Waliser and Guan, 2017). Other regions include (6) almost entire Australia, (7) large parts of the Middle East and the Indian Peninsula, and (8) very large parts of the subtropical Indian and Pacific Oceans (Fig. 6b). The latter region very likely reflects signatures of tropical cyclones that occur relatively frequently over these warm subtropical oceans (Khouakhi et. al., 2017; Franco-Diaz et al., 2019). Fractions of EPE related to intense moisture transport reaches over 90 % in most of these aforementioned regions. IVT<sub>pct</sub> structures have very limited relevance to EPEs across the tropics, where heavy rainfall typically occurs under influence of local forcing, and over high topography where IVT values rarely exceed the lower limit of 200 kg m<sup>-1</sup> s<sup>-1</sup> to identify IVT<sub>pct</sub> structures. Interestingly, EPE matches with IVT<sub>pct</sub> structures are also remarkably low on the lee side of the Rocky Mountains and the Andes, the eastern part of the Iberian Peninsula, and the entire Mediterranean Basin. These are precisely the regions where PV structures are very strongly linked to EPEs, suggesting that the upper-level forcing alone suffices to initiate their formation and does not require intense moisture transport. We will further discuss this in sections 6.2 and 7.

Hotspots where combined Rossby wave breaking and intense moisture transport are relevant for EPEs emerge predominantly over subtropical regions and to a lesser degree over extratropical regions (Fig. 6c,d). These regions include (1) southwestern North America, in particular California and the adjacent eastern North Pacific, (2) northwestern North America, with centres over the Hudson Bay and Labrador Sea, (3) northwest Africa, the southwestern part of the Iberian Peninsula, and the neighboring eastern North Atlantic, (4) the Middle East, (5) the northeastern part of the Asian continent, including the Sea of Okhotsk, (6) the western margins of South America and adjacent South Pacific, (7) southern Africa and adjacent seas, (8) the southern margins of Australia and parts of the neighboring ocean, and (9) the coastal waters of the Southern Ocean around the Antarctic continent. Many of these regions are positioned at the equatorward exit regions and poleward entrance regions of the extratropical storm tracks. Fractions of EPEs that are linked to combined PV and IVT<sub>pct</sub> structures with a direct PV influence (category 3) attain 60 % over all these regions, reach locally up to 70 % for most of these regions, and exceed 80 % near California (Fig. 6c). Turning to the combined occurrence of PV and IVT<sub>pct</sub> structures, whereby an indirect PV influence is allowed (category 4), EPE fractions demonstrate a very similar spatial distribution with about 10 to 20 % higher fractions that exceed 70 % in all aforementioned region, reach up to 80 % in most of these regions, and exceeds 90 % over California (Fig. 6d). Interestingly, many of the subtropical regions where the combined synoptic-scale processes are relevant for EPEs, have been linked to tropical-extratropical interactions that contribute to a large part of annual rainfall and heavy rainfall events (Favors and Abatzoglou, 2013; Pascale and Bordoni, 2016; Knippertz, 2003; Hart et al., 2013; De Vries et al., 2018).





Repeating the same analysis with  $IVT_{\text{filt}}$  instead of  $IVT_{\text{pct}}$  shows a very similar spatial distribution and magnitude of fractions for combined PV and IVT structures with a direct PV influence (category 3; Fig. S1c). However, EPE matches with  $IVT_{\text{filt}}$  structures (category 2; Fig. S1b) and with combined PV and IVT structures that allows an indirect PV influence (category 4; Fig. S1d) show much higher fractions over oceans. For this reason, bearing in mind the destructive impacts of EPEs and flooding over land, we focus in the remaining analysis solely on the  $IVT_{\text{pct}}$  form, hereafter simply referred to as IVT structures.

## 5 Extreme precipitation severity related to PV and IVT characteristics

Next, we explore the relationship between the extreme precipitation severity and the characteristics of Rossby wave breaking and intense moisture transport. To this end, we consider the number of isentropic surfaces with PV structures that coincide with the extreme precipitation objects as a measure of the depth and strength of the wave breaking and associated upper-level forcing. Similarly, for the IVT structures, their maximum IVT values are used as an indicator of the moisture transport intensity. This part of the analysis focuses solely on EPEs that are linked to combined Rossby wave breaking and intense moisture transport with a direct PV influence (category 3 of the previous section), and is restricted to EPEs for six different regions in the Northern Hemisphere; the subtropics ( $20^{\circ}$ - $40^{\circ}$  N), extratropics ( $40^{\circ}$ - $60^{\circ}$  N), and polar regions ( $60^{\circ}$ - $80^{\circ}$  N), over land and over water separately.

Figure 7 shows the statistical distributions of the depth of the PV structures and the averages of the moisture transport intensities for six clusters of EPEs, defined and ranked by their precipitation volumes. Across all regions, a clear relationship becomes immediately apparent. For larger precipitation volumes, we find larger IVT magnitudes, and higher numbers of isentropes with PV structures. The only exception appears over subtropical waters where the second and fourth precipitation cluster shows a slightly lower number of isentropes (the average and 90<sup>th</sup> percentile) than the preceding precipitation clusters. For all other precipitation clusters and regions, the average depth of the PV structures steadily increases towards larger precipitation volumes. Note that the average precipitation volumes for the six clusters in all six regions increases by construction due to the definition of the precipitation clusters.

Figure 7 reveals a few other interesting facts. The average IVT maximum is consistently larger over water than over land, and larger over the extratropics than over subtropical and polar regions. This finding is not too surprising as IVT is proportional to the product of specific humidity and wind, and considering that wind speeds are generally stronger at higher than at lower latitudes, and that tropospheric moisture amounts decrease towards polar regions, and are generally higher over ocean than over land. Interestingly, the two precipitation clusters with the largest precipitation volumes, found over subtropical and extratropical waters (Fig. 7d,e), go along with the highest IVT maxima ( $>1100 \text{ kg m}^{-1} \text{ s}^{-1}$ ) and the deepest

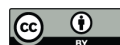

PV structures (2.4 isentropes on average, and five isentropes for the 90<sup>th</sup> percentile), underlining the profound influence of the wave breaking strength and the moisture transport intensity on the extreme precipitation severity. Furthermore, we observe that the depth of the PV structures is marginally, but consistently, larger for EPEs over water than over land. This may suggest that the upper-level forcing plays a more vital role for EPEs over homogeneous oceans, where the forcing for ascent must primarily come from upper levels, than for EPEs over land, where orographic lifting and strong surface heating can contribute to upward motion, which is consistent with findings of section 6.

In Fig. 8, we look at the relationship under discussion from a reversed perspective. We divide the 6-hourly time instances with combined PV and IVT structures that match extreme precipitation objects in different clusters, based on the IVT maximum and the depth of the PV structures. One may expect increasing frequencies with increasing IVT maxima and an increasing depth of the PV structures. However, the frequency distribution of PV and IVT characteristics do not show such a pattern and adhere to a skewed normal distribution. Interestingly; however, in all regions, the average precipitation volume increases with increasing depth of the PV structures and increasing IVT maxima. Thus, also when taking the PV and IVT characteristics as a starting point, the same conclusion emerges; the extreme precipitation severity is strongly influenced by the strength of the wave breaking and the intensity of the moisture transport.

Another interesting finding from Fig. 8 is that the average precipitation volume does not substantially increase with an increased depth of the PV structures for the lowest IVT maxima clusters (200-400 and 400-600 kg m<sup>-1</sup> s<sup>-1</sup>). This holds in all regions, and suggests that even when the upper-level forcing is very strong, the IVT intensity acts as a constraint on the precipitation volume and is thus crucial for regulating the extreme precipitation severity. This finding is in line with previous work that linked the IVT magnitude to precipitation extremes (Lavers et al., 2014; Froidevaux and Martius, 2016).

## 6 Tropospheric environments and mechanisms of EPEs

### 6.1 Tropospheric circulation in different regions

In the last part of this study, we return to the starting point of our endeavor, and examine the tropospheric environments and processes that contribute to the formation of the EPEs. To this end, we construct composites of daily means and normalized anomalies, centred on the mass-weighted centres of the EPEs, with a radius of 2000 km. Normalized anomalies are computed using daily means and standard deviations based on a 21-day running time window, centred on the day of the EPEs, following De Vries et al. (2016; 2018). Thus, daily means reflect the “average” tropospheric environment in which the EPEs develop, whereas the normalized anomalies provide a measure for the deviation of this tropospheric state from normal conditions for the time of the year and at the location of the events.



Figure 9 presents these composites for EPEs that are linked to combined Rossby wave breaking and intense moisture transport in the subtropical, extratropical and polar regions of the Northern Hemisphere, over land and water separately. EPEs in all regions clearly demonstrate the formation of an upper-level trough and cyclogenetic processes near the surface, as indicated by the 500-hPa geopotential height and mean sea level pressure contours (Fig. 9a-f). The position of the corresponding normalized anomaly centres demonstrates a backward tilt with height (Fig. 9g-l), which is suggestive of baroclinic wave growth (Hoskins et al., 1985) and consistent with other global studies on EPEs (Dai and Nie, 2020). This circulation drives intense poleward and eastward moisture transport on the downstream flank of the upper-level trough, leading to enhanced tropospheric moisture amounts in the region of extreme precipitation, exceeding 1.5 to 2.0 standard deviation (SD) (Fig. 9g-l). Daily precipitation amounts and their normalized anomalies exhibit diagonally oriented patterns, reflecting a poleward and eastward movement of the precipitating systems, most notable in the subtropics and the extratropics (Fig. 9a,b,d,e,g,h,j,k).

When comparing the tropospheric circulation and their deviation from climatology across the latitudinally varying regions, some interesting differences attract our attention. In the subtropics, pronounced 500-hPa normalized anomalies reach below  $-1.5$  SD (Fig. 9g,j), as opposed to much weaker anomalies over the extratropical and polar regions of  $-0.5$  SD (Fig. 9h,i,k,l), which reflects the strong signature of upper-level troughs that reach far into low latitudes. In addition, mean sea level pressure contours for subtropical EPEs suggest the formation of poleward reaching surface troughs that extend from the equatorial low-pressure zone under the influence of the intruding upper-level troughs (Fig. 9a,d). These characteristics are very typical of tropical-extratropical interactions that have previously been associated with precipitation and extreme precipitation in several subtropical regions (Knippertz and Martin, 2005; Hart et al., 2010; Favors and Abatzoglou, 2013; Martius et al., 2013; Pascale and Bordoni, 2016; Vellore et al., 2016; Vignaud and Robertson, 2017; De Vries et al., 2018). In contrast, the extratropical and polar regions demonstrate the more mature phases of baroclinic wave life cycles as inferred from multiple closed mean sea level pressure contours (Fig. 9b,c,e,f), reflecting the signatures of developing surface cyclones that frequently lead to precipitation extremes in these regions (Pfahl and Wernli, 2012; Papritz et al., 2014).

## 6.2 Extreme precipitation mechanisms for different synoptic categories

Finally, we attempt to disentangle the different tropospheric processes and forcing mechanisms of upward motion for EPEs that are linked to different constellations of the two synoptic-scale processes under discussion, using the “exclusive” categorization (Table 1). More specifically, composites are constructed for EPEs that are linked to (1) *only* PV structures, (2) *only* IVT structures, (3) combined PV and IVT structures with a *direct* PV influence, (4) combined PV and IVT structures, *only* with an *indirect* PV influence, and (5) *neither* PV structures *nor* IVT structures. These categories are similar to those of section 4.2; however, the assignment of EPEs to the categories is now exclusive, meaning that a specific EPE only belongs to one category and that matching with multiple categories is ruled out. Composites are complemented with 500-hPa QG



ascent and low-tropospheric static stability, and only include EPEs for the period of 1979-2016 due to the availability of QG vertical motion for only these years. The composites are discussed for the Northern Hemispherical subtropical regions over land and water, where the largest differences manifest between the five categories (Figs. 10 and 11). The findings presented in this section also hold to a large extent in the extratropics (Figs. S2 and S3), while the differences between the categories largely disappear in the polar regions (not shown). Regions in the Southern Hemisphere show generally a similar pattern, although the unequal distribution of land and water surfaces leave a noticeable imprint on these patterns. For this reason, we only include the composites of EPEs over water in the subtropical and extratropical Southern Hemisphere in the supplement (Figs. S4 and S5).

Composites of subtropical EPEs that are linked to combined Rossby wave breaking and intense moisture transport, with a direct PV influence (category 3), show strong 500-hPa QG ascent near the centre of the EPEs, both over land and water (Figs. 10c,h, and 11c,h). Daily mean QG ascent exceeds  $0.1$  ( $0.075$ )  $\text{Pa s}^{-1}$  and their normalized anomalies surpass  $1.5$  ( $2.0$ ) SD over land (water). In addition, the low-tropospheric static stability is reduced by about  $0.25$  SD over a large part of the extreme precipitation region over water, reaching  $0.5$  SD along its margins (Fig. 11h), whereas no substantial reductions are observed over land (Fig. 10h). This suggests that ascent induced by the balanced flow has an important influence on the formation of EPEs, over both land and ocean, whereas the relevance of reduced static stability is weaker and confined to EPEs over ocean.

EPEs that are linked to combined PV and IVT structures, exclusively with an indirect PV influence (category 4), show remarkable differences compared to those with a direct PV influence (category 3). The upper-level forcing appears in the form of a wider, open-trough like structure that covers a larger spatial extent and is positioned farther away from the extreme precipitation centre in a poleward-westward direction (Figs. 10d,i and 11d,i). Importantly, the centre of QG ascent is located farther away from the extreme precipitation centre and has a lower magnitude that reaches about  $0.05$   $\text{Pa s}^{-1}$  and  $1$  STD over both land and water (Figs. 10d,i and 11d,i). Also, the region of reduced static stability for EPEs over water is positioned far away from its centre, and lacks any spatial overlap with the extreme precipitation imprint (Fig. 11i). These findings suggests that EPEs of this category arise from the upper-level forcing that steers more zonally-oriented moisture transport towards the region of extreme precipitation, consistent with IVT daily means and normalized anomaly vectors (Figs. 10d,i and 11d,i), whereby the direct influence of the upper-level forcing on ascent has only a reduced or negligible influence. Presumably, other forcing mechanism for ascent play a dominant role here, such as (1) orographic lifting of the moist air masses for EPEs over land, (2) the potential effects of condensational heating on the vertical stability, and (3) other mesoscale processes that shape the organization of convective storms.



EPEs that are exclusively linked to Rossby wave breaking (category 1) exhibit similar characteristics as those linked to  
 635 combined PV and IVT structures with a direct PV influence (category 3), except for few remarkable differences. By  
 definition, daily mean IVT and their normalized anomaly vectors remain very low (Figs. 10a,f and 11a,f). Interestingly, the  
 500-hPa geopotential height normalized anomalies reflect the signatures of upper-level troughs that reach far equatorward  
 and are positioned very close to the centre of extreme precipitation (Figs. 10f and 11f). The direct influence of the upper-  
 level forcing is manifested by strong QG ascent that exceeds  $0.075 \text{ Pa s}^{-1}$  and 1.5 STD over both land and water, and reduced  
 640 static stability of about 0.25 SD for a marginal region over land (Fig. 10f) and of more than 0.5 SD over water across almost  
 the entire extreme precipitation imprint (Fig. 11f). Destabilization of the lower troposphere by the upper-level PV anomaly is  
 of particular importance for EPEs of this category over water. As previously suggested, these events are likely found over  
 warm subtropical waters, such as the Mediterranean Sea. Presumably, stratospheric PV streamers reach into a moist  
 tropospheric environment, where the upper-level forcing suffices to trigger deep moist convection, without requiring intense  
 645 moisture transport.

EPEs that are exclusively linked to intense moisture transport (category 2) display a very similar tropospheric circulation  
 (Figs. 10b and 11b) as those linked to combined PV and IVT structures with exclusively an indirect PV influence (category  
 4). The upper-level trough and dynamical lifting are substantially weaker, as indicated by normalized anomalies in 500-hPa  
 650 geopotential height and QG ascent of about  $-0.5 \text{ SD}$  and  $0.5 \text{ SD}$ , respectively, over both land and water (Figs. 10g and 11g).  
 Finally, EPEs that occur in absence of both PV and IVT structures (category 5) exhibit very weak (over water) or virtually  
 absent (over land) deviations in 500-hPa geopotential height and mean sea level pressure (Figs. 10j and 11j). This implies  
 that the large-scale forcing is weak and that the EPEs occur in a moist tropospheric environment (TCW normalized  
 anomalies attain  $+1.5 \text{ SD}$  over both water and land) under the influence of local forcing mechanisms, which include  
 655 destabilization of the troposphere over water (Fig. 11j), and presumably other processes such as orographic lifting and  
 surface heating over land.

## 7 Synthesis

Naturally, the question arises as to where these 5 categories of synoptic-scale processes are important for EPEs, and whether  
 they have an importance influence on the extreme precipitation severity. Figure 12 presents the spatial distribution of EPEs  
 660 that are linked to the five exclusive categories, their share in the total number of EPEs, and their partition in different  
 precipitation volume clusters. These categories demonstrate a distinct geographical distribution, consistent with previous  
 results and the process-based understanding derived from the composite analysis in the previous section. In the following,  
 we summarize the main characteristics of these five categories, and place these in context of well-known weather  
 phenomena and existing literature. EPEs that are linked to:



- 1) **only Rossby wave breaking** are confined to distinct regions over (i) central North America and southeastern South America, (ii) the Mediterranean and Caspian Seas, including the eastern Iberian Peninsula, and (iii) several local areas, such as the eastern portions of Iceland, Ireland, the United Kingdom, and the Balkans, parts of Germany and Poland, the Caucasus, north of the Himalaya's, the western margins of northern Chili, and parts of Antarctica. Interestingly, most of these regions are located poleward and eastward of high topographic barriers and vast deserts (e.g., the Sahara, Rocky Mountains, Andes, Alps, Taurus and Zagros Mountains, and the Himalaya's), suggesting that these regions are deprived from remote moisture supplies. EPEs arise when Rossby wave breaking provides sufficient upper-level forcing through reduction of low-tropospheric stratification and dynamical lifting to initiate the extreme precipitation, as confirmed by the composites. Likely, these events form when PV streamers reach in a relatively moist tropospheric environment and/or when strong evaporation from warm sea surfaces, such as the Mediterranean Sea, provides sufficient moisture on the local scale (Winschall et al., 2014; Raveh-Rubin and Wernli, 2016);
- 2) **only intense moisture transport** reach around the globe at higher tropical and lower subtropical latitudes, away from the inner tropics, but beyond the reach of the extratropical upper-level forcing. EPEs of this category are most likely associated with (i) tropical cyclones over the western and eastern North Pacific near East Asia and Central America, respectively, the southern Indian Ocean near Madagascar and the Maritime Continent near north Australia, and the Gulf of Mexico and the southeastern USA (Prat and Nelson, 2016; Khouakhi et. al., 2017; Franco-Diaz et al., 2019), (ii) tropical easterly waves over North Africa, the North Atlantic, the Caribbean, and Central America (Ladwig and Stensrud, 2009; Cretat et al., 2015; Vigaud and Robertson, 2017), and (iii) monsoon lows/depression over India and neighboring regions in South Asia, the eastern North Pacific near Central America, and north Australia (Hurley and Boos, 2015; Berry and Reeder, 2016);
- 3) **combined Rossby wave breaking and intense moisture transport with a direct PV influence** dominate over the larger part of the globe, from subtropical to polar latitudes. This category is particularly relevant in (semi)arid subtropical regions where tropical-extratropical interactions are of central importance for (heavy) rainfall events (Wright 1997; Knippertz, 2003; Favors and Abatzoglou, 2013; Hart et al., 2013; Pascale and Bordoni, 2016; De Vries et al., 2018). These events arise when the midlatitude forcing reaches into low latitudes, couples with the tropical low-level circulation, initiating a poleward moisture incursion into these dry regions;
- 4) **combined Rossby wave breaking and intense moisture transport, exclusively with an indirect PV influence** emerge over large parts of the extratropical westerly coasts of North and South America, and also over western margins of Iceland, Norway, and New Zealand. Remote Rossby wave breaking steers intense moisture transport towards these mountainous coastal zones where orographic lifting provides forcing for upward motion, whereas the direct influence of the upper-level forcing through dynamical lifting or reduced static stability for ascent is weak or negligible. This mechanism is very typical of Rossby wave breaking that goes along with the formation and landfall





of atmospheric rivers (Payne and Magnusdottir, 2014, 2016; Mundhenk et al., 2016b; Hu et al., 2017). In addition, events of this category also emerge over subtropical regions in transition zones between categories 2 and 3 over Australia and East Asia. Presumably, the PV streamers reach into low latitudes and initiate poleward transport of tropical moisture, but are positioned too far away to exert a direct forcing for ascent, consistent with the Jeddah, Indian and Pakistan flooding events as discussed in section 3;

- 5) **neither Rossby wave breaking nor intense moisture transport** are predominantly found over (i) the inner tropics, (ii) high topography at lower latitudes, such as the Himalaya's, the Ethiopian Highlands, the Mexican Plateau, and the Altiplano in the Andes, and (iii) the core polar regions. The limited relevance of the two synoptic-scale processes over these regions can be explained by the strong local forcing that gives rise to EPEs over the tropics (e.g., Maranan et al., 2018) and high topography. In addition, air at high altitudes and latitudes can only hold very low moisture amounts, resulting in relatively low IVT that rarely exceeds  $200 \text{ kg m}^{-1} \text{ s}^{-1}$ . Also, over the Poles, the detection of PV streamers can be questionable as the stratospheric bodies are centred over these regions.

Interestingly, regions where none of the five exclusive categories dominate (the white regions in Fig. 12) coincide to a large extent with those where cyclones and warm conveyor belts have the highest relevance for precipitation extremes (Pfahl and Wernli, 2012; Pfahl et al., 2014). Whereas these well-known weather systems, focus of numerous studies, have a particular relevance for precipitation and extreme precipitation in wet higher latitude regions, the combined occurrence of Rossby wave breaking and intense moisture transport is very important for EPEs in (semi)arid subtropical regions that received relatively little scientific attention.

Although EPEs associated with neither PV nor IVT structures comprise the larger part of worldwide total events (36.7 %; Fig. 12b), their share reduces drastically toward higher extreme precipitation volumes (Fig. 12c). Likewise, percentages of EPEs linked to only Rossby wave breaking reduce drastically from the lowest (28.2 %) to the highest (3.3 %) precipitation volume clusters. In contrast, the share of EPEs linked to all three synoptic categories that involve IVT structures increase dramatically toward higher precipitation volumes. For example, the synoptic categories of only intense moisture transport (category 2) and combined Rossby wave breaking and intense moisture transport with a direct PV influence (category 3) almost quadruple from the lowest to the highest precipitation volume clusters; from 9.1 % to 35.0 %, and from 8.0 % to 29.4 %, respectively (Fig. 12c). These findings underscore once more that IVT can act as a constraint on the extreme precipitation volume and is highly associated with the extreme precipitation severity.



## 8 Conclusions

This study presented for the first time qualitative and quantitative evidence on the role of Rossby wave breaking and intense moisture transport for the formation of EPEs at the global scale. The importance of these synoptic-scale processes was first demonstrated by a number of previously documented flood events with catastrophic socioeconomic impacts in different parts of the world, and then complemented by a comprehensive climatological analysis, using state-of-the-art objects-based identification methods for (i) daily EPEs, (ii) stratospheric PV streamers, and (iii) IVT structures. This climatological analysis addressed three major aspects (1) the geographical distribution of EPEs that are linked to Rossby wave breaking, intense moisture transport, and their combined occurrence, (2) the influence of the strength of the wave breaking (i.e., the upper-level forcing) and the intensity of the moisture transport on the extreme precipitation severity, and (3) the nature of the tropospheric environment and mechanism of upward motion that contribute to the formation of EPEs. Accordingly, the introduction stated three research questions that are addressed in the following three paragraphs.

Rossby wave breaking is frequently associated with EPEs in subtropical and extratropical regions, in particular in the vicinity of high topography and over the Mediterranean ( $> 90\%$ ). Intense moisture transport is strongly linked to EPEs across the globe, especially over coastal zones where continental land borders vast ocean ( $> 90\%$ ), consistent with findings of atmospheric-river related studies (Ralph et al., 2006; Lavers et al., 2013a; Waliser and Guan, 2017). Combined Rossby wave breaking and intense moisture transport contribute substantially to EPEs in subtropical regions and to a lesser degree in extratropical regions ( $> 70\%$ ). Subtropical regions that stand out include southwestern North America, northwest Africa, the Middle East, the western flanks of southern South America, and the southern coasts of Africa and Australia. According to previous studies, and in line with our composites, these subtropical regions typically receive precipitation and extreme precipitation from tropical-extratropical interactions (Knippertz, 2003; Hart et al., 2013; Favors and Abatzoglou, 2013; Pascale and Bordoni, 2016; De Vries et al., 2018), whereby the midlatitude forcing reaches into low latitudes in the form of upper-level troughs that initiate poleward excursions of tropical moisture into these dry subtropical regions (Knippertz, 2007). These meteorological processes are very well represented by the combination of stratospheric PV streamers and IVT structures that reflect such transient tropical-extratropical interactions at synoptic scales (De Vries et al., 2018). In addition, EPEs also frequently co-occur with surface cyclones (Pfahl and Wernli, 2012) and PV cutoffs (Portmann et al., in preparation). These components are not explicitly included in our analysis and may complement the findings of this study in future research.

One unique aspect of this study is the combined application of PV and IVT. PV has been of invaluable importance in dynamic meteorology during the last decades (Hoskins et al., 1985) and has previously been used to diagnose (i) the influence of the upper-level forcing on precipitation generation (Funatsu and Waugh, 2008; Schlemmer et al., 2010; Martius et al., 2013) and (ii) Rossby wave breaking as a key driver of EPEs (Massacand et al., 1998; Martius et al., 2006; De Vries et



760 al., 2018; Moore et al., 2019). IVT became rapidly popular during the last decade, not only as an essential diagnostic for atmospheric rivers, but also as a general characteristic of the tropospheric environment that supports the development of extreme precipitation (Moore et al., 2015; Froidevaux and Martius, 2016). We use both variables to identify two key larger-scale dynamic and thermodynamic processes, and present conclusive evidence on their relationship with the extreme precipitation severity. Whether taking the extreme precipitation volume or the characteristics of the two synoptic-scale processes as a starting point, leads to the same conclusion: the deeper the PV streamers, and the higher the IVT maxima, the larger the extreme precipitation volumes. Thus, the strength of the wave breaking and intensity of the moisture transport are inherently linked to the extreme precipitation severity.

Based upon our detailed composites, and well-established principles in dynamic meteorology, we present a concept of the meteorological processes that lead to the formation of EPEs (Fig. 13). This concept involves (1) baroclinic wave growth whereby anomalies in the upper and lower tropospheric circulation interact and mutually amplify each other, (2) the upper-level forcing, in the form of a stratospheric PV streamer, that steers intense moisture transport towards the region of extreme precipitation, and (3) various mechanism through which the upper-level forcing can favor ascent and deep moist convection, including (i) reduced static stability beneath the upper-level PV anomaly, (ii) dynamical lifting on its downstream flank, and (iii) interaction of the larger-scale flow with topography (slowing down of the circulation and lee cyclogenesis), which can orient and anchor a low-tropospheric moist air flow towards the topographic barrier (not depicted in the schematic). This model builds upon longstanding concepts in the literature. Hoskins et al. (1985) explained baroclinic wave growth in a PV perspective by the mutual interaction and strengthening of PV anomalies in the upper and lower troposphere. Furthermore, they also envisaged the potential of PV to study intrusions of extratropical air masses into low latitudes in relation to tropical-extratropical interactions. More recently, several case studies proposed combinations of mechanism through which an upper-level PV anomaly can initiate ascent, deep moist convection and precipitation generation (Funatsu and Waugh, 2008; Schlemmer et al., 2010; Martius et al., 2013). Our study presents climatological evidence on the contribution of these processes to EPEs, apart from orographic lifting, for different constellations of PV and/or IVT structures and for different regions in which these EPEs occur. QG ascent is particularly enhanced in regions of subtropical and extratropical EPEs that co-occur with PV structures, whereas reduced static stability is predominantly confined to these EPEs over water.

Going beyond the three central research questions of this study, we propose that different combinations of Rossby wave breaking and intense moisture transport may perfectly serve for a new definition and classification of weather regimes for EPEs across climate zones (Fig. 12). Over the inner tropics and high topography, EPEs arise predominantly under the influence of local forcing, and both synoptic-scale processes are irrelevant. At the outer bands of the tropics and lower subtropics, IVT structures are highly associated with the formation of EPEs, reflecting well-known weather phenomena such as tropical cyclones, tropical easterly waves, and monsoon lows (Prat and Nelson, 2016; Cretat et al., 2015; Hurley and



Boos, 2015). Slightly beyond these latitudes, the midlatitude upper-level forcing comes into play, and across the larger part of the globe, from subtropical to polar latitudes, EPEs are governed by combined Rossby wave breaking and intense moisture transport, including dry desert regions that can be affected by tropical-extratropical interactions (see above). Several extratropical coastal regions, on western flanks of continental land, frequently experience EPEs when remote, far upstream Rossby wave breaking steers a moist air flow towards these mountainous coasts, conform previous studies that linked the formation and landfall of atmospheric rivers to wave breaking (Payne and Magnusdottir, 2014, 2016; Mundhenk et al., 2016b; Hu et al., 2017). Other specific extratropical regions are deprived from remote moisture transport by high mountain barriers or vast deserts, and EPEs occur when the upper-level forcing appears in the form of Rossby wave breaking, and reaches into a relatively moist tropospheric environment or when evaporation from local water bodies provides sufficient moisture. This new classification may have reduced relevance over the core polar regions, where the identification of PV streamers can be questionable.

Before concluding, we list three limitations of this study. First, the EPEs are defined on daily timescales and large spatial scales ( $>50,000 \text{ km}^2$ ), and thus, our findings may have reduced relevance for precipitation extremes at hourly and multi-day timescales as well as local flash floods over complex topography. Second, the EPEs are derived from reanalysis precipitation with inherent limitations, and although these may only weakly affect our EPEs due to their relatively large spatiotemporal characteristics, it would be interesting to extend the analysis of this study to other types of precipitation observational datasets. Third, the findings of this study may be sensitive to several choices in the methodology, such as the PV streamer geometry, the IVT form and threshold, the extreme precipitation definition, the minimum surface areas of the objects, and the criteria for the matching of the extreme precipitation objects with the PV and IVT structures.

In summary, this study shows that Rossby wave breaking and intense moisture transport are of central importance for the formation of EPEs. This relation holds globally except for the inner tropics and core polar regions. These findings may contribute to an improved understanding of the atmospheric processes that lead to EPEs, and may benefit medium-range weather prediction and early warning systems that can reduce flood risk and alleviate their socioeconomic impacts. Also, the presented methodology can be applied to climate model simulations for the past and projected future to provide a new perspective on how and why EPEs will change in a warming climate. Moreover, such an endeavor may provide new insights into the strengths and limitations of climate models in representing key synoptic-scale (thermo)dynamic processes of EPEs.



## Code and data availability

ERA-Interim data from ECMWF is available from (<https://www.ecmwf.int/>), and the codes and data from this study can be provided by the author upon request.

## 825 Competing interest

The author declares no competing interests.

## Author contribution

AV formed the ideas, prepared the data, designed the methodology, developed the computer algorithms, analyzed the data, created the figures, and wrote the manuscript.

## 830 Acknowledgements

The author thanks Raphael Portmann (ETH Zürich), Michael Riemer (University of Mainz), and Stephan Pfahl (Freie Universität Berlin) for their comments on an early version of the manuscript. Deep gratitude goes to Heini Wernli (ETH Zürich) for inspiring discussions and detailed feedback on this manuscript. Also, the author would like to thank Huug Ouwersloot for contributing to the algorithm for detection of EPEs, and Klaus Klingmüller (Max Planck Institute for  
835 Chemistry) for his help to run the algorithm for PV streamers on the supercomputer Mistral from DKRZ. Furthermore, thanks go to Matthias Röthlisberger (ETH Zürich) for helpful discussions, to Michael Sprenger (ETH Zürich) for providing global QG vertical motion, and to Jonathan Vigh (NCAR) for drawing the author's attention to the great Colorado floods in September 2013. The National Center for Atmospheric Research (NCAR) command language (NCL), version 6.3.0, has been used for the identification of PV streamers, and version 6.5.0, for identification of other object-based features, all  
840 computations, and the visualization of the results.

## Financial support

The author acknowledges support from the PIRE funding scheme, via the Swiss National Science Foundation (SNSF) grant nr. 177996.

845



## References

- Abatzoglou, J. T.: Contribution of cutoff lows to precipitation across the United States, *J. Appl. Meteorol. Clim.*, 55, 893–899, <https://doi.org/10.1175/JAMC-D-15-0255.1>, 2016.
- 850 Agel, L., Barlow, M., Colby, F., Binder, H., Catto, J. L., Hoell, A., and Cohen, J.: Dynamical analysis of extreme precipitation in the US northeast based on large-scale meteorological patterns, *Clim. Dynam.*, 52, 1739–1760, <https://doi.org/10.1007/s00382-018-4223-2>, 2019.
- Appenzeller, C. and Davies, H.: Structure of stratospheric intrusions into the troposphere, *Nature*, 358, 570–572,  
 855 <https://doi.org/10.1038/358570a0>, 1992.
- Argence, S., Lambert, D., Richard, E., Sohne, N., Chaboureau, J. P. Crepin, F., and Arbogast, P.: High resolution numerical study of the Algiers 2001 flash flood: Sensitivity to the upper-level potential vorticity anomaly, *Adv. Geosci.*, 7, 251–257, 2006.
- 860 Ashley, T. and Ashley, W. S.: Flood fatalities in the United States, *J. Appl. Meteorol. Clim.*, 47, 805–818, DOI: 10.1175/2007JAMC1611.1, 2008.
- Barlow, M., Gutowski, W.J., Gyakum, J.R., Katz, R.W., Lim, Y.K., Schumacher, R.S., Wehner, M.F., Agel, L., Bosilovich,  
 865 M., Collow, A., Gershunov, A., Grotjahn, R., Leung, R., Milrad, S., and Min, S.K.: North American extreme precipitation events and related large-scale meteorological patterns: a review of statistical methods, dynamics, modeling, and trends. *Clim. Dynam.*, 53, 6835–6875. <https://doi.org/10.1007/s00382-019-04958-z>, 2019.
- Barbero, R., Abatzoglou, J. T., and Fowler, H. J.: Contribution of large-scale midlatitude disturbances to hourly precipitation  
 870 extremes in the United States, *Clim. Dynam.*, 52, 197–208, <https://doi.org/10.1007/s00382-018-4123-5>, 2019.
- Barredo, J.I.: Major flood disasters in Europe: 1950–2005, *Nat. Hazards*, 42, 125–148, <https://doi.org/10.1007/s11069-006-9065-2>, 2007.
- 875 Benedict, J. J., Clement, A. C., Medeiros, B.: Atmospheric blocking and other large-scale precursor patterns of landfalling atmospheric rivers in the North Pacific: A CESM2 study, *J. Geophys. Res. Atmos.*, 124, 11330–11353, DOI: 10.1029/2019JD030790, 2019.





- Berry, G., Reeder, M. J., and Jakob, C.: A global climatology of atmospheric fronts, *Geophys. Res. Lett.*, 38, L04809, 880 <https://doi.org/10.1029/2010GL046451>, 2011.
- Berry G. J. and Reeder, M. J.: The dynamics of Australian monsoon bursts, *J. Atmos. Sci.*, 73, 55-69, DOI: 10.1175/JAS-D-15-0071.1, 2016.
- 885 Berrisford, P., Dee, D., Poli, P., Brugge, R., Fielding, K., Fuentes, M., Kallberg, P., Kobayashi, S., Uppala, S., and Simmons, A.: The ERA-Interim Archive, ERA report series, 1, 1–23, <https://www.ecmwf.int/en/elibrary/8174-era-interim-archive-version-20>, 2011.
- Bozkurt, D., Rondanelli, R., Garreaud, R., and Arriagada, A.: Impact of warmer eastern tropical Pacific SST on the March 890 2015 Atacama floods, *Mon. Weather Rev.*, 144, 4441–4460, 2016.
- Catto, J. L. and Pfahl, S.: The importance of fronts for extreme precipitation, *J. Geophys. Res. Atmos.*, 118, 10,791–10,801, <https://doi.org/10.1002/jgrd.50852>, 2013.
- 895 Catto, J.L., Madonna, E., Joos, H., Rudeva, I., Simmonds, I.: Global relationship between fronts and warm conveyor belts and the impact on extreme precipitation, *J. Climate*, 28, 8411–8429. <https://doi.org/10.1175/JCLI-D-15-0171.1>, 2015.
- Chen, G. T.-J. and Yu, C.-C.: Study of low-level jet and extremely heavy rainfall over northern Taiwan in the mei-yu season, *Mon. Weather Rev.*, 116, 884–891, 1988.
- 900 Crétat, J., Vizzy, E. K., Cook, K.H.: The relationship between African easterly waves and daily rainfall over West Africa: observations and regional climate simulations, *Clim. Dynam.*, 44, 385–404, <https://doi.org/10.1007/s00382-014-2120-x>, 2015.
- 905 Crespo N. M., da Rocha, R. P., Sprenger, M., and Wernli, H.: A potential vorticity perspective on cyclogenesis over centre-eastern South America, *Int. J. Climatol.*, 1-16, 2020.
- Dacre, H. F., Clark, P. A., Martinez-Alvarado, O., and Stringer, M. A.: How do atmospheric rivers form?, *B. Am. Meteorol. Soc.*, 96, 1243–1255, 2015.

910



- Dacre, H. F., Martinez-Alvarado, O., and Mbengue, C. O.: Linking atmospheric rivers and warm conveyor belt airflows, *J. Hydrometeorol.*, 20, 1183–1196, 2019.
- Dai, P. and Nie, J.: A global quasi-geostrophic diagnosis of extreme precipitation, *J. Climate*, 1–45,  
 915 <https://doi.org/10.1175/JCLI-D-20-0146.1>, 2020.
- Davies, H.C.: The quasigeostrophic omega equation: reappraisal, refinements, and relevance, *Monthly Weather Review*, 143, 3–25, 2015.
- 920 De Vries, A. J., Tyrlis, E., Edry, D., Krichak, S. O., Steil, B., and Lelieveld, J.: Extreme precipitation events in the Middle East: Dynamics of the Active Red Sea Trough, *J. Geophys. Res. Atmos.*, 118, 7087–7108, 2013.
- De Vries, A. J., Feldstein, S. B., Riemer, M., Tyrlis, E., Sprenger, M., Baumgart, M., Fnais, M., and Lelieveld, J.: Dynamics of tropical-extratropical interactions and extreme precipitation events in Saudi Arabia in autumn, winter and spring, *Q. J. Roy. Meteor. Soc.*, 142, 1862–1880, 2016.  
 925
- De Vries, A. J., Tropical-extratropical interactions and extreme precipitation events in the Middle East, PhD thesis, University of Mainz, Mainz, Germany, <https://openscience.ub.uni-mainz.de/handle/20.500.12030/2662>, 2018.
- 930 De Vries A. J., Ouwersloot, H. G., Feldstein, S. B., Riemer, M., El Kenawy, A. M., McCabe, M. F., and Lelieveld, J.: Identification of tropical-extratropical interactions and extreme precipitation events in the Middle East based on potential vorticity and moisture transport, *J. Geophys. Res. Atmos.*, 123, 861–881, 2018.
- Dee, D. P., Uppala, S. M., Simmons, A. J., Berrisford, P., Poli, P., Kobayashi, S., Andrae, U., Balmaseda, M. A., Balsamo, G., Bauer, P., Bechtold, P., Beljaars, A. C. M., van de Berg, L., Bidlot, J., Bormann, N., Delsol, C., Dragani, R., Fuentes, M., Geer, A. J., Haimberger, L., Healy, S. B., Hersbach, H., Hólm, E. V., Isaksen, L., Kållberg, P., Köhler, M., Matricardi, M., McNally, A. P., Monge-Sanz, B. M., Morcrette, J.-J., Park, B.-K., Peubey, C., de Rosnay, P., Tavolato, C., Thépaut, J.-N., and Vitart, F.: The ERA-Interim reanalysis: configuration and performance of the data assimilation system, *Q. J. Roy. Meteor. Soc.*, 137, 553–597, <https://doi.org/10.1002/qj.828>, 2011.  
 940
- Dinku, T., Ceccato, P., and Connor, S. J.: Challenges of satellite rainfall estimation over mountainous and arid parts of east Africa, *Int. J. Remote sens.*, 32, 5965–5979, 2011.



- 945 Doswell, C. A., Brooks, H. E., and Maddox, R. A.: Flash flood forecasting: An ingredients-based methodology, *Weather Forecast.*, 11, 560–581, [https://doi.org/10.1175/15200434\(1996\)011<0560:FFFAIB>2.0.CO;2](https://doi.org/10.1175/15200434(1996)011<0560:FFFAIB>2.0.CO;2), 1996.
- Donat, M. G., Sillmann, J., Wild, S., Alexander, L. V., Lippmann, T., and Zwiers, F. W.: Consistency of temperature and precipitation extremes across various global gridded in situ and reanalysis datasets, *J. Climate*, 27, 5019–5035, 2014.
- 950 Eckhardt, S., Stohl, A., Wernli, H., James, P., Forster, C., and Spichtinger, N.: A 15-Year Climatology of Warm Conveyor Belts, *J. Climate*, 17, 218–237, [https://doi.org/10.1175/1520-0442\(2004\)017<0218:AYCOWC>2.0.CO;2](https://doi.org/10.1175/1520-0442(2004)017<0218:AYCOWC>2.0.CO;2), 2004.
- Eden, J. M., Wolter, K., Otto, F. E. L., and van Oldenborgh, G. J.: Multi-method attribution analysis of extreme precipitation in Boulder, Colorado, *Environ. Res. Lett.*, 11, 124009, <https://doi.org/10.1088/1748-9326/11/12/124009>, 2016.
- 955 Espinoza, V., Waliser, D. E., Guan, B., Lavers, D. A., and Ralph, F. M.: Global Analysis of Climate Change Projection Effects on Atmospheric Rivers, *Geophys. Res. Lett.*, 45, 4299–4308, 2018.
- 960 Favre, A., Hewitson, B., Lennard, C., Cerezo-Mota, R., and Tadross, M.: Cut-off lows in the South Africa region and their contribution to precipitation, *Clim. Dynam.*, 41, 2331–2351, <https://doi.org/10.1007/s00382-012-1579-6>, 2013.
- Favors, J. E. and Abatzoglou, J. T.: Regional surges of monsoonal moisture into the southwestern United States, *Mon. Weather Rev.*, 141, 182–191, 2013.
- 965 Franco-Díaz, A., Klingaman, N. P., Vidale, P. L., Guo, L., and Demory, M.-E.: The contribution of tropical cyclones to the atmospheric branch of Middle America’s hydrological cycle using observed and reanalysis tracks, *Clim. Dynam.*, 53, 6145–6158, <https://doi.org/10.1007/s00382-019-04920-z>, 2019.
- 970 Fröhlich, L., Knippertz, P., Fink, A. H., and Hohberger, E.: An objective climatology of Tropical Plumes, *J. Climate*, 26, 5044–5060, [doi:10.1175/JCLI-D-12-00351.1](https://doi.org/10.1175/JCLI-D-12-00351.1), 2013.
- Froidevaux, P. and Martius, O.: Exceptional integrated vapour transport toward orography: an important precursor to severe floods in Switzerland, *Q. J. R. Meteorol. Soc.*, 142, 1997–2012, 2016.
- 975 Funatsu, B. M. and Waugh, D. W.: Connections between potential vorticity intrusions and convection in the Eastern Tropical Pacific, *J. Atmos. Sci.*, 65, 987–1002, 2008.



- 980 Gates, W. L.: Static stability measures in the atmosphere, *J. Meteorol.*, 18, 526-533, 1960.
- Gimeno, L., Dominguez, F., Nieto, R., Trigo, R. M., Drumond, A., Reason, C., and Marengo, J.: Major Mechanisms of Atmospheric Moisture Transport and Their Role in Extreme Precipitation Events, *Annu. Rev. Env. Resour.*, 41, 117–141, <https://doi.org/10.1146/annurev-environ-110615-085558>, 2016.
- 985 Gochis, D., Schumacher, R., Friedrich, K., Doesken, N., Kelsch, M., Sun, J., Ikeda, K., Lindsey, D., Wood, A., Dolan, B., Matrosov, S., Newman, A., Mahoney, K., Rutledge, S., Johnson, R., Kucera, P., Kennedy, P., Sempere-Torres, D., Steiner, M., Roberts, R., Wilson, J., Yu, W., Chandrasekar, V., Rasmussen, R., Anderson, A., and Brown, B.: The great Colorado flood of September 2013, *B. Am. Meteorol. Soc.*, 96, 1461–1487, <https://doi.org/10.1175/BAMS-D-13-00241.1>, 2015.
- 990 Graf, M. A., Wernli, H., and Sprenger, M.: Objective classification of extratropical cyclogenesis, *Q. J. R. Meteorol. Soc.*, 143, 1047–1061, <https://doi.org/10.1002/qj.2989>, 2017.
- Grazzini, F., Graig, G. C., Keil, C., Antolini, G., and Pavan, V.: Extreme precipitation events over northern Italy. Part 1: A systematic classification with machine-learning techniques, *Q. J. R. Meteorol. Soc.*, 146, 69-85, 2019.
- 995 Guan, B. and Waliser, D. E.: Detection of atmospheric rivers: Evaluation and application of an algorithm for global studies, *J. Geophys. Res.-Atmos.*, 120, 12514–12535, <https://doi.org/10.1002/2015JD024257>, 2015.
- Haggag, M. and El-Badry, H.: Mesoscale Numerical Study of Quasi-Stationary Convective System over Jeddah in  
 1000 November 2009, *Atmos. Clim. Sci.*, 3, 73-86, doi:10.4236/acs.2013.31010, 2013.
- Hart, N. C. G., Reason, C. J. C., and Fauchereau, N.: Tropical-extratropical interactions over southern Africa: Three cases of heavy summer season rainfall, *Mon. Weather Rev.*, 138, 2608-2623, 2010.
- 1005 Hart, N. C. G., Reason, C. J. C., and Fauchereau, N.: Building a tropical extratropical cloud band metbot, *Mon. Weather Rev.*, 140, 4005–4016, 2012.
- Hart, N.C.G., Reason, C.J.C., and Fauchereau, N.: Cloud bands over southern Africa: seasonality, contribution to rainfall variability and modulation by the MJO, *Clim. Dynam.*, 41, 1199 – 1212, doi: <https://doi.org/10.1007/s00382-012-1589-4>,  
 1010 2013.



- Hong, C-C., Hsu, H.-H., Lin, N.-H., and Chiu, H.: Roles of European blocking and tropical–extratropical interaction in the 2010 Pakistan flooding, *Geophys. Res. Lett.*, 38, L13806., 2011.
- 1015 Hoskins, B. J., Draghici, I., and Davies, H. C.: A new look at the v-equation. *Q. J. Roy. Meteor. Soc.*, 104, 31–38, doi:10.1002/qj.49710443903, 1978.
- Hoskins, B., McIntyre, M., and Robertson, A.: On the use and significance of isentropic potential vorticity maps, *Q. J. Royal Meteorol. Soc.*, 111, 877–946, <https://doi.org/10.1256/smsqj.47001>, 1985.
- 1020 Hsu, H. H. and Chen, Y. T.: Simulation and projection of circulations associated with atmospheric rivers along the North American northeast coast, *J. Climate*, 33, 5673–5695, 2020.
- 1025 Ryoo, J., Kaspi, Y., Waugh, D.W., Kiladis, G.N., Waliser, D.E., Fetzer E.J., Kim J.: Impact of Rossby wave breaking on U.S. West Coast winter precipitation during ENSO events, *J. Climate*, 26, 6360–6382, <https://doi.org/10.1175/JCLI-D-12-00297.1>, 2013.
- Hurley J. V. and Boos, W. R.: A global climatology of monsoon low-pressure systems, *Q. J. Roy. Meteor. Soc.*, 141, 1049–1064, 2015.
- 1030 Hawcroft, M., Shaffrey, L., Hodges, K., and Dacre, H.: How much Northern Hemisphere precipitation is associated with extratropical cyclones?, *Geophys. Res. Lett.*, 39, L24809, <https://doi.org/10.1029/2012GL053866>, 2012.
- 1035 Joseph, S., Sahai, A. K., Sharmila, S., Abhilash, S., Borah, N., Chattopadhyay, R., Pillai, P. A., Rajeevan, M., Kumar, A. North Indian heavy rainfall event during June 2013: diagnostics and extended range prediction, *Clim. Dynam.*, 44, 2049–2065, 2015.
- Kahana, R., Ziv, B., Enzel, Y., and Dayan, U.: Synoptic climatology of major floods in the Negev Desert, Israel, *Int J. Climatol.*, 22, 867–882, doi:10.1002/joc.766, 2002.
- 1040 Khouakhi, A., Villarini, G., and Vecchi, G. A.: Contribution of tropical cyclones to rainfall at the global scale, *J. Climate*, 30, 359–372, 2017.



- 1045 Knippertz, P.: Tropical-extratropical interactions causing precipitation in northwest Africa: Statistical analysis and seasonal variations, *Mon. Weather Rev.*, 131, 3069-3076, 2003.
- Knippertz, P. and Martin, J. E.: Tropical plumes and extreme precipitation in subtropical and tropical West Africa, *Q. J. Roy. Meteor. Soc.*, 131, 2337–2365, 2005.
- 1050 Knippertz, P.: Tropical–extratropical interactions related to upper-level troughs at low latitudes, *Dynam. Atmos. Oceans*, 43, 36–62, doi:10.1016/j.dynatmoce.2006.06.003, 2007.
- Knippertz, P. and Martin, J. E.: A Pacific moisture conveyor belt and its relationship to a significant precipitation event in  
 1055 the semiarid southwestern United States, *Weather Forecast.*, 22, 125-144, 2007.
- Knippertz, P. and Wernli, H.: A Lagrangian climatology of tropical moisture exports to the Northern Hemispheric extratropics, *J. Climate*, 23, 987–1003, doi:10.1175/2009JCLI3333.1, 2010.
- 1060 Knippertz, P., Wernli, H., and Gläser, G.: A Global Climatology of Tropical Moisture Exports, *J. Climate*, 26, 3031–3045, doi:10.1175/JCLI-D-12-00401.1, 2013.
- Krichak, S. O., Breitgand, J. S., and Feldstein, S. B.: A conceptual model for the identification of active Red Sea Trough synoptic events over the southeastern Mediterranean, *J. Appl. Meteorol. Clim.*, 5, 962–971, doi:10.1175/JAMC-D-11-  
 1065 0223.1, 2012.
- Ladwig, W. C. and Stensrud, D. J.: Relationship between tropical easterly waves and precipitation during the North America monsoon, *J. Climate*, 22, 258-271, 2009.
- 1070 Lavers, D. A., Villarini, G., Allan, R. P., Wood, E. F., and Wade, A. J.: The detection of atmospheric rivers in atmospheric reanalyses and their links to British winter floods and the large-scale climatic circulation, *J. Geophys. Res.-Atmos.*, 117, D20106, <https://doi.org/10.1029/2012JD018027>, 2012.
- Lavers, D. A. and Villarini, G.: The nexus between atmospheric rivers and extreme precipitation across Europe, *Geophys. Res. Lett.*, 40, 3259–3264, doi:10.1002/grl.50636, 2013.
- 1075



- Lavers, D. A. and Villarini, G.: The contribution of atmospheric rivers to precipitation in Europe and the United States, *J. Hydrol.*, 522, 382–390, <https://doi.org/10.1016/j.jhydrol.2014.12.010>, 2015.
- 1080 Lavers, D. A., Pappenberger, F., and Zsoter, E.: Extending medium-range predictability of extreme hydrological events in Europe, *Nat. Commun.*, 5, 5382, <https://doi.org/10.1038/ncomms6382>, 2014.
- Lavers, D. A., F. M. Ralph, D. E. Waliser, A. Gershunov, and M. D. Dettinger (2015), Climate change intensification of horizontal water vapor transport in CMIP5, *Geophys. Res. Lett.*, 42, 5617–5625.
- 1085 Lavers, D. A., Pappenberger, F., Richardson, D. S., and Zsoter, E.: ECMWF Extreme Forecast Index for water vapor transport: A forecast tool for atmospheric rivers and extreme precipitation, *Geophys. Res. Lett.*, 43, 11852–11858, <https://doi.org/10.1002/2016GL071320>, 2016.
- 1090 Liu, B. J., Tan, X. Z., Gan, T. Y., Chen, X. H., Lin, K. R., Lu, M. Q., Liu, Z. Y.: Global atmospheric moisture transport associated with precipitation extremes: mechanisms and climate change impacts, *Wires Water*, 7, <https://doi.org/10.1002/wat2.1412>, 2020.
- Liu, C. and Barnes, E. A.: Extreme moisture transport into the Arctic linked to Rossby wave breaking, *J. Geophys. Res. Atmos.*, 120, 3774–3788, 2015.
- 1095 Madonna, E., Wernli, H., Joos, H., and Martius, O.: Warm conveyor belts in the ERA-Interim dataset (1979–2010). Part I: climatology and potential vorticity evolution, *J. Climate*, 27, 3–26, <https://doi.org/10.1175/JCLI-D-12-00720.1>, 2014.
- 1100 Mahoney, K., Jackson, D. L., Neiman, P., Hughes, M., Darby, L., Wick, G., White, A., Sukovich, E., and Cifelli, R.: Understanding the Role of Atmospheric Rivers in Heavy Precipitation in the Southeast United States, *Mon. Weather Rev.*, 144, 1617–1632, <https://doi.org/10.1175/MWR-D-15-0279.1>, 2016.
- 1105 Maranan, M., Fink, A. H., and Knippertz, P.: Rainfall types over southern West Africa: Objective identification, climatology and synoptic environment, *Q. J. Roy. Meteor. Soc.*, 144, 1628–1648, <https://doi.org/10.1002/qj.3345>, 2018.
- Martius, O., Zenklusen, E., Schwierz, C., and Davies, H. C.: Episodes of Alpine heavy precipitation with an overlying elongated stratospheric intrusion: A climatology, *Int. J. of Climatol.*, 26, 1149–1164, <https://doi.org/10.1002/joc.1295>, 2006.





- 1110 Martius, O., Schwierz, C., and Davies, H. C.: Breaking waves at the tropopause in the wintertime Northern Hemisphere: Climatological analyses of the orientation and the theoretical LC1/2 classification, *J. Atmos. Sci.*, 64, 2576–2592, <https://doi.org/10.1175/JAS3977.1>, 2007.
- Martius, O., Sodemann, H., Joos, H., Pfahl, S., Winschall, A., Croci-Maspoli, M., Graf, M., Madonna, E., Mueller, B.,  
 1115 Schemm, S., Sedláček, J., Sprenger, M., and Wernli, H.: The role of upper-level dynamics and surface processes for the Pakistan flood of July 2010, *Q. J. Royal Meteorol. Soc.*, 139, 1780–1797, <https://doi.org/10.1002/qj.2082>, 2013.
- Massacand, A. C., Wernli, H. and Davies, H. C.: Heavy precipitation on the alpine southside: An upper-level precursor, *Geophys. Res. Lett.*, 25, 1435–1438, doi:10.1029/98GL50869, 1998.
- 1120 McGuirk, J.P., Thompson, A.H., and Schaefer, J.R.: An eastern Pacific tropical plume, *Mon. Weather Rev.*, 116, 2505–2521, 1988.
- McIntyre, M. E. and Palmer, T.: Breaking planetary waves in the stratosphere, *Nature*, 305, 593, 1983.
- 1125 Moore, B. J., Mahoney, K. M., Sukovich, E. M., Cifelli, R., and Hamill, T. M.: Climatology and environmental characteristics of extreme precipitation events in the southeastern United States, *Mon. Weather Rev.*, 143, 718–741, 2015.
- Mundhenk, B. D., Barnes, E. A., and Maloney, E. D.: All-season climatology and variability of atmospheric river  
 1130 frequencies over the North Pacific, *J. Climate*, 29, 4885–4903, 2016a.
- Mundhenk, B. D., Barnes, E. A., Maloney, E. D., and Nardi, K. M.: Modulation of atmospheric rivers near Alaska and the US West Coast by northeast Pacific height anomalies, *J. Geophys. Res. Atmos.*, 121, 12,751–12,765, doi:10.1002/2016JD025350, 2016b.
- 1135 Monaghan, A., Rife, D. L., Pinto, J. O., Davis, C. A., and Hannan, J. R.: Global precipitation extremes associated with diurnally varying low-level jets, *J. Climate*, 23, 5065–5084, <https://doi.org/10.1175/2010JCLI3515.1>, 2010.
- Moore, B. J., Keyser, D., and Bosart, L. F.: Linkages between extreme precipitation events in the central and eastern United  
 1140 States and Rossby wave breaking, *Mon. Weather Rev.*, 147, 3327–3349, 2019.



Neiman, P. J., Ralph, F. M., Wick, G. A., Lundquist, J. D., and Dettinger, M. D.: Meteorological Characteristics and Overland Precipitation Impacts of Atmospheric Rivers Affecting the West Coast of North America Based on Eight Years of SSM/I Satellite Observations, *J. Hydrometeorol.*, 9, 22–47, <https://doi.org/10.1175/2007JHM855.1>, 2008.

145

Neu, U., Akperov, M. G., Bellenbaum, N., Benestad, R., Blender, R., Caballero, R., Coccozza, A., Dacre, H. F., Feng, Y., Fraedrich, K., Grieger, J., Gulev, S., Hanley, J., Hewson, T., Inatsu, M., Keay, K., Kew, S. F., Kindem, I., Leckebusch, G. C., Liberato, M. L. R., Lionello, P., Mokhov, I. I., Pinto, J. G., Raible, C. C., Reale, M., Rudeva, I., Schuster, M., Simmonds, I., Sinclair, M., Sprenger, M., Tilinina, N. D., Trigo, I. F., Ulbrich, S., Ulbrich, U., Wang, X. L., and Wernli, H.: IMILAST: A  
 150 Community Effort to Intercompare Extratropical Cyclone Detection and Tracking Algorithms, *B. Am. Meteorol. Soc.*, 94, 529–547, <https://doi.org/10.1175/BAMS-D-11-00154.1>, 2013.

Newell, R., Newell, N., Zhu, Y., and Scott, C.: Tropospheric rivers? A pilot study, *Geophys. Res. Lett.*, 19, 2401–2404, <https://doi.org/10.1029/92GL02916>, 1992.

155

Nie, J. and Fan, B.: Roles of dynamic forcings and diabatic heating in summer extreme precipitation in East China and the Southeastern United States, *J. Climate*, 32, 5815–5831, 2019.

160

Papritz, L., Pfahl, S., Rudeva, I., Simmonds, I., Sodemann, H., and Wernli, H.: The role of extratropical cyclones and fronts for Southern Ocean freshwater fluxes, *J. Climate*, 27, 6205–6224, <https://doi.org/10.1175/JCLI-D-13-00409.1>, 2014.

Pascale, S. and Bordoni, S.: Tropical and extratropical controls of Gulf of California surges and summertime precipitation over the southwestern United States, *Mon. Weather Rev.*, 144, 2695–2718, 2016.

165

Pasquier J. T., Pfahl S., and Grams, C. M.: Modulation of atmospheric river occurrence and associated precipitation extremes in the North Atlantic region by European weather regimes, *Geophys. Res. Lett.*, 46, 1014–1023, 2018.

170

Payne, A. E. and Magnusdottir, G.: Dynamics of landfalling atmospheric rivers over the North Pacific in 30 years of MERRA reanalysis, *J. Climate*, 27, 7133–7150, 2014.

Payne, A. E. and Magnusdottir, G.: Persistent landfalling atmospheric rivers over the west coast of North America, *J. Geophys. Res. Atmos.*, 121, 13287–1330, 2016.



- 175 Pfahl, S. and Wernli, H.: Quantifying the relevance of cyclones for precipitation extremes, *J. Climate*, 25, 6770–6780,  
<https://doi.org/10.1175/JCLI-D-11-00705.1>, 2012.
- Pfahl, S., Madonna, E., Boettcher, M., Joos, H., and Wernli, H.: Warm conveyor belts in the ERA-Interim data set (1979–  
 2010). Part II: Moisture origin and relevance for precipitation, *J. Climate*, 27, 27–40, <https://doi.org/10.1175/JCLI-D-13-00223.1>, 2014.
- 180 Pohorsky, R., Rothlisberger, M., Grams, C. M., Riboldi, J., and Martius, O.: The climatological impact of recurving North  
 Atlantic tropical cyclones on downstream extreme precipitation events, *Mon. Weather Rev.*, 147, 1513–1532, 2019.
- Portmann, R., González-Alemán, J. J., Sprenger, M., and Wernli, H.: Medicane Zorbas: Origin and impact of an uncertain  
 185 potential vorticity streamer, *Weather Clim. Dynam. Discuss.*, <https://doi.org/10.5194/wcd-2019-1>, in review, 2019.
- Portmann, R., Sprenger, M., and Wernli, H.: The three-dimensional life cycle of potential vorticity cutoffs: A global ERA-  
 interim climatology (1979–2017), *Weather Clim. Dynam. Discuss.*, <https://doi.org/10.5194/wcd-2020-30>, in review, 2020.
- 190 Postel, G.A. and Hitchman M. H.: A climatology of Rossby wave breaking along the subtropical tropopause, *J. Atmos. Sci.*,  
 56, 359–373, DOI: 10.1175/1520-0469(1999)056<0359:ACORWB>2.0.CO;2, 1999.
- Prat, O. P. and Nelson, B. R.: On the link between tropical cyclones and daily rainfall extremes derived from global satellite  
 observations, *J. Climate*, 29, 6127–6135, 2016.
- 195 Radic, V., Cannon, A. J., Menounos, B., and Gi, N.: Future changes in autumn atmospheric river events in British Columbia,  
 Canada, as projected by CMIP5 global climate models, *J. Geophys. Res.-Atmos.*, 120, 9279–9302,  
<https://doi.org/10.1002/2015JD023279>, 2015.
- 200 Ralph, F. M., Neiman, P. J., and Wick, G. A.: Satellite and CALJET aircraft observations of atmospheric rivers over the  
 eastern North Pacific Ocean during the winter of 1997/98, *Mon. Weather Rev.*, 132, 1721–1745, doi:10.1175/1520-  
 0493(2004)132<1721:SACAOO>2.0.CO;2, 2004.
- Ralph, F. M., Neiman, P. J., Wick, G. A., Gutman, S. I., Dettinger, M. D., Cayan, D. R., and White, A. B.: Flooding on  
 205 California’s Russian River: Role of atmospheric rivers, *Geophys. Res. Lett.*, 33, L13801,  
<https://doi.org/10.1029/2006GL026689>, 2006.



- 1210 Ralph, F. M., Kiladis, G. N., Weickmann, K., and Reynolds, D. W.: A multiscale observational case study of a Pacific atmospheric river exhibiting tropical/extratropical connections and a mesoscale frontal wave, *Mon. Weather Rev.*, 139, 1169–1189, 2011.
- Ramos, A. M., Trigo, R. M., Liberato, M. L. R., and Tome, R.: Daily precipitation extreme events in the Iberian Peninsula and its association with atmospheric rivers, *J. Hydrometeorol*, 16, 579–597, doi:10.1175/JHM-D-14-0103.1, 2015.
- 1215 Raveh-Rubin, S. and Wernli, H.: Large-scale wind and precipitation extremes in the Mediterranean: a climatological analysis for 1979–2012, *Q. J. Roy. Meteor. Soc.*, 141, 2404–2417, https://doi.org/10.1002/qj.2531, 2015.
- Raveh-Rubin, S., and Wernli, H.: Large-scale wind and precipitation extremes in the Mediterranean: dynamical aspects of five selected cyclone events. *Quart. J. Roy. Meteorol. Soc.*, 142, 3097–3114, 2016.
- 1220 Röthlisberger, M., Martius, O., and Wernli, H.: Northern Hemisphere Rossby wave initiation events on the extratropical jet – A climatological analysis, *J. Climate*, 31, 743–760, 2018.
- Rubin, S., Ziv, B., and Paldor, N.: Tropical plumes over eastern North Africa as a source of rain in the Middle East, *Mon. Weather Rev.*, 135, 4135–4148, 2007.
- 1225 Rutz, J. J., Steenburgh, W. J., and Ralph, F. M.: Climatological characteristics of atmospheric rivers and their inland penetration over the western United States, *Mon. Weather Rev.*, 142, 905–921, 2014.
- 1230 Ryoo, J. M., Kaspi, Y., Waugh, D. W., Kiladis, G. N., Waliser, D. E., Fetzer, E. J., and Kim, J.: Impact of Rossby wave breaking on U.S. West Coast winter precipitation during ENSO events, *J. Climate*, 26, 6360–6382, 2013.
- Schemm, S., Rudeva, I., and Simmonds, I.: Extratropical fronts in the lower troposphere—global perspectives obtained from two automated methods, *Q. J. Roy. Meteor. Soc.*, 141, 1686–1698, 2015.
- 1235 Schlemmer, L., O. Martius, M. Sprenger, C. Schwierz, and A. Twitchett (2010), Disentangling the forcing mechanisms of a heavy precipitation event along the alpine south side using potential vorticity inversion, *Mon. Weather Rev.*, 138, 2336–2353.



- 240 Simmonds, I, Keay, K., Bye, J. A. T.: Identification and climatology of Southern Hemisphere mobile fronts in a modern  
 reanalysis, *J. Climate*, 25, 1945-1962, 2012.
- Skok, G., Tribbia, J., Rakovec, J., and Brown, B.: Object-based analysis of satellite-derived precipitation systems over the  
 low- and midlatitude Pacific Ocean, *Mon. Weather Rev.*, 137, 3196-3218, 2009.
- 245 Sousa P. M., Ramos, A. M., Riabie, C. C., Messmer, M. Tome, R., Pinto, J. G.: North Atlantic integrated water vapor  
 transport – from 850 to 2100 CE: Impacts on Western European rainfall, *J. Climate*, 33(1), <https://doi.org/10.1175/JCLI-D-19-0348.1>, 2020
- 250 Sprenger, M., Fragkoulidis, G., Binder, H., Croci-Maspoli, M., Graf, P., Grams, C. M., Knippertz, P., Madonna, E.,  
 Schemm, S., Skerlak, B., and Wernli, H.: Global climatologies of Eulerian and Lagrangian flow features based on ERA-  
 interim, *B. Am. Meteorol. Soc.*, 98, 1739–1748, <https://doi.org/10.1175/BAMS-D-15-00299.1>, 2017.
- Sprenger, M., O. Martius, and Arnold, J.: Cold surge episodes over southeastern Brazil - a potential vorticity perspective, *Int.*  
 255 *J. Climatol.*, 33, 2758-2767, 2013.
- Strong, C., and Magnusdottir, G.: Tropospheric Rossby wave breaking and the NAO/NAM, *J. Atmos. Sci.*, 65, 2861–2876,  
[doi:10.1175/2008JAS2632.1](https://doi.org/10.1175/2008JAS2632.1), 2008.
- 260 Stucki, P., Froidevaux, P., Zamuriano, M., Isotta, F. A., Messmer, M., and Martynov, A.: Simulations of the 2005, 1910, and  
 1876 Vb cyclones over the Alps – sensitivity to model physics and cyclonic moisture flux, *Nat. Hazards Earth Syst. Sci.*, 20,  
 35–57, <https://doi.org/10.5194/nhess-20-35-2020>, 2020.
- Sun, Q., Miao, C., Duan, Q., Ashouri, H., Sorooshian, S., and Hsu, K.-L.: A Review of Global Precipitation Data Sets: Data  
 265 Sources, Estimation, and Intercomparisons, *Rev. Geophys.*, 56, 79–107, <https://doi.org/10.1002/2017RG000574>, 2018.
- Swales, D., Alexander, M., and Hughes, M.: Examining moisture pathways and extreme precipitation in the U.S.  
 intermountain west using self-organizing maps, *Geophys. Res. Lett.*, 43, 1727-1735, 2016.
- 270 Tan, X. Z., Gan, T. Y., and Chen, Y. D.: Synoptic moisture pathways associated with mean and extreme precipitation over  
 Canada for summer and fall, *Clim. Dynam.*, 52, 2959-2979, 2019



- 1275 Terti, G., Ruin, I., Anquetin, S., and Gourley, J. J.: A situation-based analysis of flash flood fatalities in the United States, B. Am. Meteorol. Soc., 98, 333–345, 2017.
- 1280 Thorncroft, C., Hoskins, B., and McIntyre, M.: Two paradigms of baroclinic-wave life-cycle behaviour, Q. J. Royal Meteorol. Soc., 119, 17–55, <https://doi.org/10.1002/qj.49711950903>, 1993.
- 1285 Triegaardt, D. O., Terblanche, D. E., Van Heerden, J., Laing, M. V.: The Natal flood of September 1987, South African Weather Bureau Tech. Paper No. 19, 62 pp., 1988.
- 1290 Tsuji, H. and Takayabu, Y. N.: Precipitation enhancement via the interplay between atmospheric rivers and cutoff lows, Mon. Weather Rev., 147, 2451–2466, 2019.
- 1285 van Heerden, J. and Taljaard, J. J.: Africa and surrounding waters, Meteorology of the Southern Hemisphere, Published by the Am. Meteorol. Soc., Vol. 27, Number 49, Chapter 3D, DOI 10.1007/978-1-935704-10-2, 1998.
- 1290 Vellore, R., Kaplan, M., Krishnan, R., Lewis, J., Sabade, S., Deshpande, N., Singh, B. Madhura, R., and Rama Rao, M. V. S.: Monsoon–extratropical circulation interactions in Himalayan extreme rainfall, Clim. Dynam., 46, 3517–3546, 2016.
- Vigaud, N. and Robertson, A.: Convection regimes and tropical-midlatitude interactions over the Intra-American Seas from May to November, Int. J. Climatol., 37, 987–1000, 2017.
- 1295 Waliser, D. and Guan, B.: Extreme winds and precipitation during landfall of atmospheric rivers, Nat. Geosci., 10, 179–183, <https://doi.org/10.1038/ngeo2894>, 2017.
- Wernli, H. and Schwieler, C.: Surface cyclones in the ERA-40 dataset (1958–2001). Part I: Novel identification method and global climatology, J. Atmos. Sci., 63, 2486–2507, <https://doi.org/10.1175/JAS3766.1>, 2006.
- 1300 Wernli, H. and Sprenger, M.: Identification and ERA-15 climatology of potential vorticity streamers and cutoffs near the extratropical tropopause, J. Atmos. Sci., 64, 1569–1586, <https://doi.org/10.1175/JAS3912.1>, 2007.
- 1305 White, R. H., Battisti, D. S., Skok, G.: Tracking precipitation events in time and space in gridded observational data, Geophys. Res. Lett., 44, 8637–8646, 2017.



Winschall, A., Sodemann, H., Pfahl, S., and Wernli, H.: How important is intensified evaporation for Mediterranean precipitation extremes?, *J. Geophys. Res.-Atmos.*, 119, 5240–5256, doi:10.1002/2013JD021175, 2014.

Wilcox, A., Escauriaza, C., Agredano, R., Mignot, E., Zuazo, V., Otárola, S., Castro, L., Gironás, J., Cienfuegos, R., and  
1310 Mao, L.: An integrated analysis of the March 2015 Atacama floods, *Geophys. Res. Lett.*, 43, 8035–8043, 2016.

Wright, W. J.: Tropical-extratropical cloudbands and Australian rainfall: I. *Climatology*, *Int. J. Climatol.*, 17, 807–829, 1997.

Zambrano-Bigiarini, M., Nauditt, A., Birkel, C., Verbist, K., and Ribbe, L.: Temporal and spatial evaluation of satellite-  
1315 based rainfall estimates across the complex topographical and climatic gradients of Chile, *Hydrol. Earth Syst. Sci.*, 21, 1295–  
1320, <https://doi.org/10.5194/hess-21-1295-2017>, 2017.

Zhang, X., Alexander, L., Hegerl, G. C., Jones, P., Tank, A. K., Peterson, T. C., Trewin, B., and Zwiers, F. W.: Indices for  
monitoring changes in extremes based on daily temperature and precipitation data, *WIREs Clim. Change*, 2, 851–870,  
1320 <https://doi.org/10.1002/wcc.147>, 2011.





**Table 1.** Methodology for linking EPEs to synoptic-scale processes

| Link to EPEs                                | Rosby wave breaking | Intense moisture transport | Rosby wave breaking & intense moisture transport (direct PV influence) | Rosby wave breaking & intense moisture transport (indirect PV influence) | NONE                          |
|---------------------------------------------|---------------------|----------------------------|------------------------------------------------------------------------|--------------------------------------------------------------------------|-------------------------------|
| “inclusive” categories (section 4.2)        | All PV structures   | All IVT structures         | PV (direct overlap) & IVT structures                                   | PV (direct & indirect overlap) & IVT structures                          |                               |
| “exclusive” categories (sections 6.2 and 7) | Only PV structures  | Only IVT structures        | PV (direct overlap) & IVT structures                                   | PV (only indirect overlap) & IVT structures                              | Neither PV nor IVT structures |

325 **Table 2.** Example cases of EPEs, flooding, and their socioeconomic impacts (EM-DAT)<sup>a</sup>

| Nr | Year | Month | Days  | Country      | Location <sup>b</sup>                 | Deaths | Affected people | Damage<br>US\$ (M) | Literature                                                |
|----|------|-------|-------|--------------|---------------------------------------|--------|-----------------|--------------------|-----------------------------------------------------------|
| 1  | 2014 | 9     | 27    | USA          | Arizona                               |        |                 |                    | Yang et al., 2019                                         |
| 2  | 2013 | 9     | 9-16  | USA          | <i>Colorado, New Mexico</i>           | 9      | 21,900          | 1,900              | Gochis et al., 2015;<br>Eden et al., 2016                 |
| 3  | 2002 | 1     | 9-11  | Mauritania   | <i>Trarza, Brakna, Gorgol</i>         | 25     | 27,500          |                    | Knippertz and Martin, 2005                                |
|    |      |       |       | Senegal      | <i>St. Louis, Matam, Louga</i>        | 28     | 179,000         | 41                 |                                                           |
| 4  | 2000 | 10    | 15    | Switzerland  | <i>Valais</i>                         | 16     | 1,500           | 330                | Froidevaux and Martius, 2016;                             |
|    |      |       |       | Italy        | <i>Lombardia, Piemonte</i>            | 25     | 43,000          | 8,000              | Pfahl et al., 2014                                        |
| 5  | 2009 | 11    | 25    | Saudi Arabia | Jeddah, Mecca cities                  | 161    | 10,000          | 900                | Haggag and El-Badry, 2013;<br>De Vries et al., 2016;      |
| 6  | 2010 | 7     | 19-22 | Pakistan     | <i>Balochistan</i>                    | 60     | 4,000,          | -                  | Martius et al., 2013;                                     |
|    |      |       | 28-30 |              | <i>Balochistan<sup>c</sup></i>        | 1,985  | 20,356,550      | 9,500              | Hong et al., 2011                                         |
| 7  | 2013 | 6     | 17-18 | India        | <i>Uttarakhand<sup>d</sup></i>        | 6,054  | 504,473         | 1,100              | Joseph et al., 2015;<br>Vellore et al., 2016              |
| 8  | 2015 | 3     | 24-26 | Chile        | <i>Atacama, Antofagasta, Coquimbo</i> | 178    | 193,881         | 1,500              | Wilcox et al., 2016;<br>Bozkurt et al., 2016;             |
| 9  | 2007 | 3     | 25-31 | Argentina    | <i>Santa Fe, Entre Rios</i>           | 5      | 70,000          | 10                 | Cavalcanti, 2012                                          |
|    |      |       |       | Uruguay      | <i>Colonia<sup>c</sup></i>            |        |                 |                    |                                                           |
| 10 | 2006 | 4     | 16-23 | Namibia      |                                       |        |                 |                    | Muller et al., 2008                                       |
| 11 | 1987 | 9     | 26-29 | South Africa | Natal, Kwazulu                        | 506    | 65,000          | 765                | Triegaardt et al., 1988<br>van Heerden and Taljaard, 1998 |
| 12 | 2011 | 1     | 9-14  | Australia    |                                       |        |                 |                    | Whelan & Frederiksen, 2017                                |

<sup>a</sup>the reported socioeconomic impacts include the disaster (sub)types flash floods, riverine floods, and landslides.

<sup>b</sup>text in italic refers to provinces

<sup>c</sup>only one of several affected provinces reported is listed

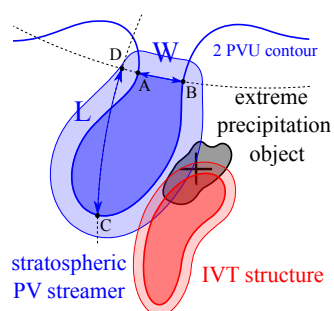

**Figure 1.** Schematic representation of Rossby wave breaking (stratospheric PV streamer in blue) and intense moisture transport (IVT structure in red) as synoptic-scale processes of EPEs (extreme precipitation object in black), adapted from De Vries et al., (2018). The light blue and light red shading illustrate the area of influence of the synoptic features, and the symbols W and L refer to the geometrical criteria of PV streamers, as further detailed in section 2.3.

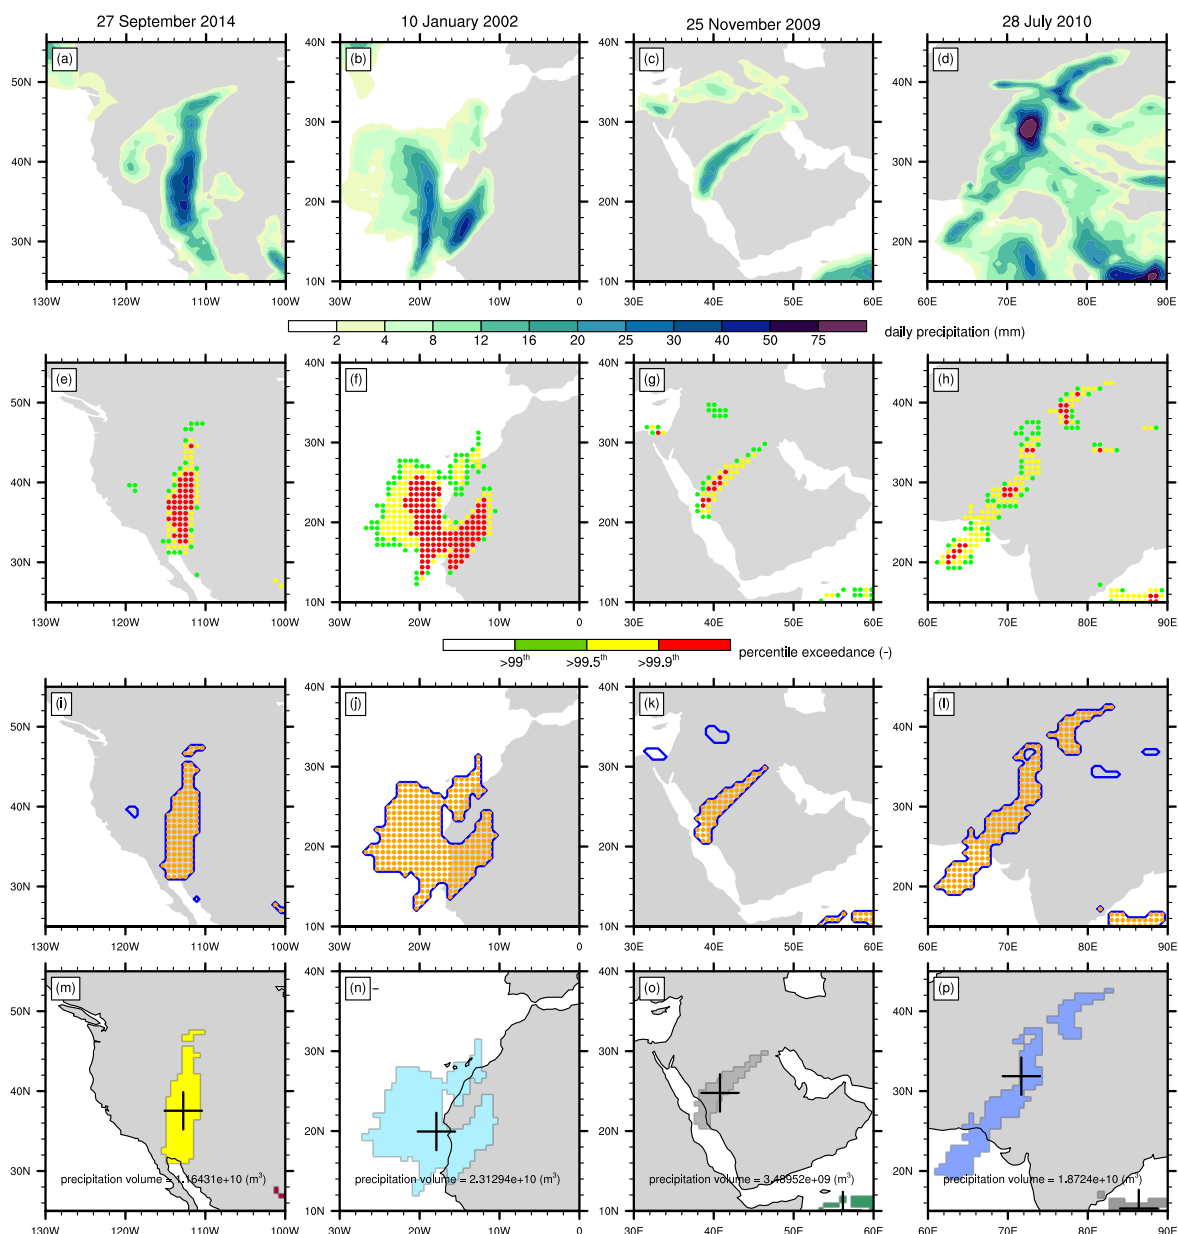

**Figure 2.** Examples of the algorithm for identification of EPEs for (first column) Arizona, USA, on 27 September 2014, (second column) northwest Africa on 10 January 2002, (third column) Jeddah, Saudi Arabia, 25 November 2009, and (fourth column) Pakistan, 28 July 2010. In (a)-(d) daily rainfall amounts, (e)-(h) grid points that exceed the annual >99th (green), 99.5th (yellow), and 99.9th (red) percentiles, (j)-(l) extreme precipitation objects with a surface > 50,000 km<sup>2</sup> and consisting of connected grid points within  $R < 250$  km, and (m)-(p) extreme precipitation objects illustrated by random colours, with their mass-weighted centres denoted by the markers, and their volumes (m<sup>3</sup>) stated in the text.

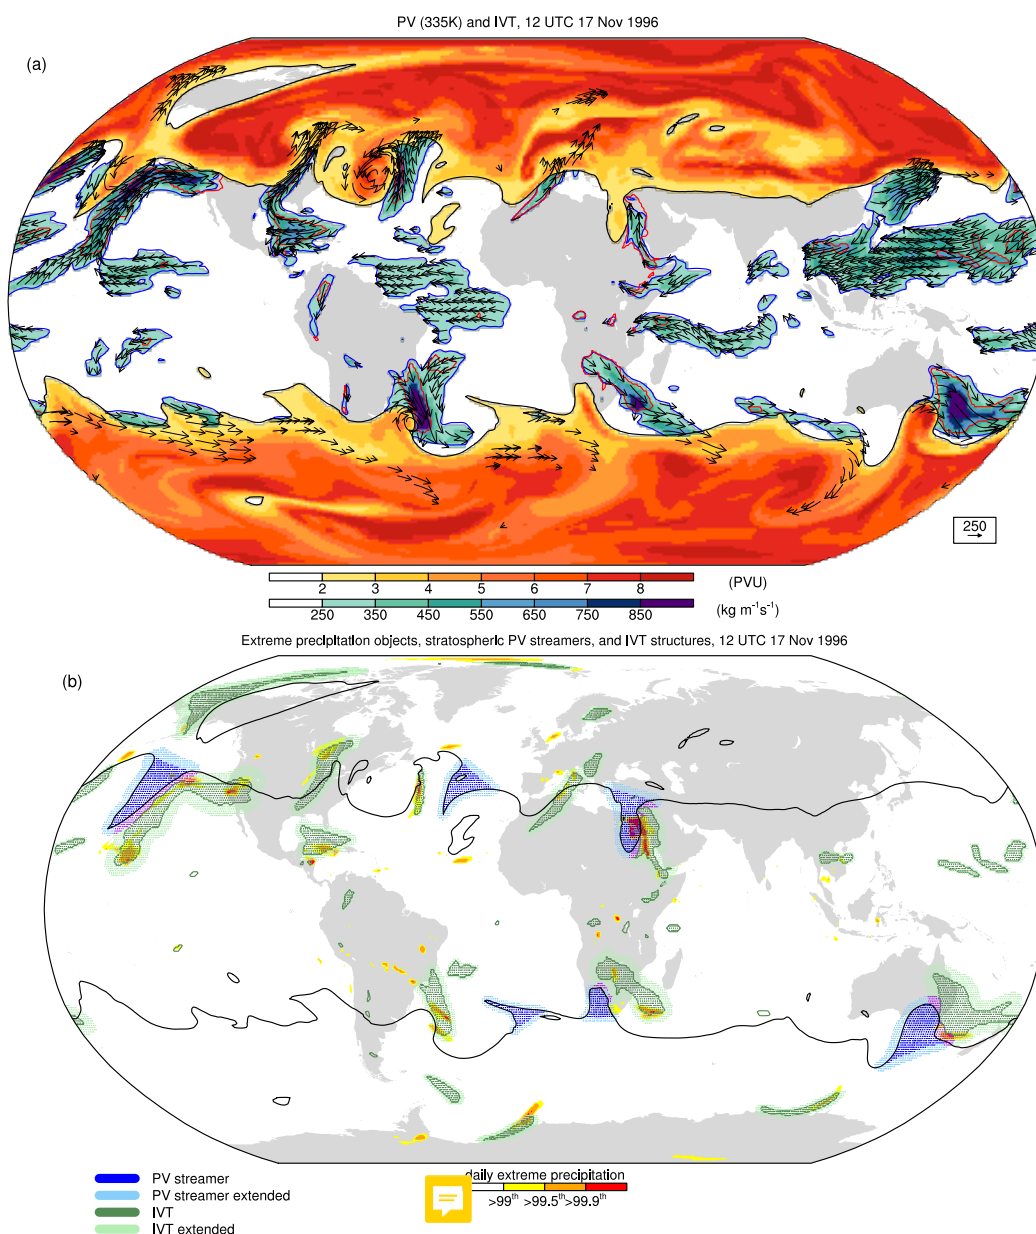

**Figure 3.** Example of the algorithm (a) input and (b) output for stratospheric PV streamers and IVT structures at 12 UTC 17 November 1996. In (a) PV (PVU) on 335 K in yellow/red colours, and full IVT ( $\text{kg m}^{-1} \text{s}^{-1}$ ) in green/blue colours, and IVT vectors in black, only plotted where the full IVT magnitude  $> 250 \text{ kg m}^{-1} \text{s}^{-1}$ . Contour lines denote the 2 PVU contours (black), the  $250 \text{ kg m}^{-1} \text{s}^{-1}$  full IVT (blue), and the annual 95th IVT percentile with a lower threshold of  $200 \text{ kg m}^{-1} \text{s}^{-1}$  (red). In (b) the identified stratospheric PV streamers, IVT structures in the IVT<sub>pct</sub> form, and their areas of influence, as indicated by the colours in the legend. Also, (b) shows the 99th, 99.5th and 99.9th percentiles exceedances of daily ERA-Interim precipitation.

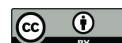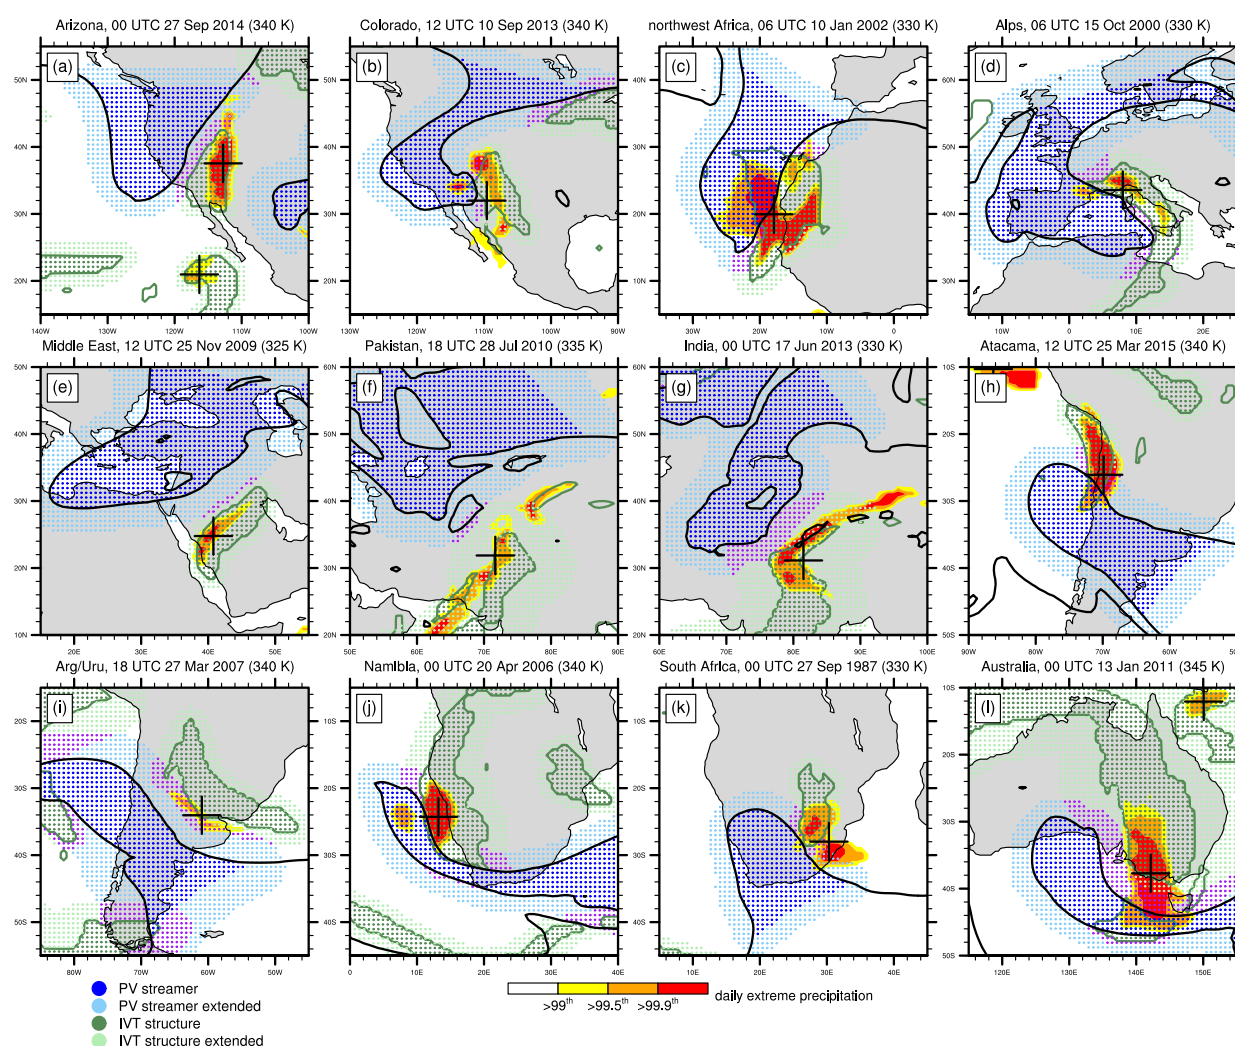

**Figure 4.** Illustrative cases of extreme precipitation and flooding accompanied by stratospheric PV streamers and IVT structures in (a) Arizona, USA, 00 UTC 27 September 2014, (b) Colorado, USA, 12 UTC 10 September 2013, (c) northwest Africa, 06 UTC 10 January 2002, (d) the Alpine region, 06 UTC 15 October 2000, (e) the Middle East, Jeddah, 12 UTC 25 November 2009, (f) Pakistan, 18 UTC 28 July 2010, (g) India, 00 UTC 17 June 2013, (h) the Atacama Desert in Chile, 12 UTC 25 March 2015, (i) Argentina and Uruguay, 18 UTC 28 March 2007, (j) Namibia, 00 UTC 20 April 2006, (k) South Africa, 00 UTC 27 September 1987, and (l) Australia, 00 UTC 13 January 2011. All meteorological variables and identified objects correspond to those as in Fig. 3b with the exception of extreme precipitation for which only the objects instead of all percentile-exceeding grid points are shown.

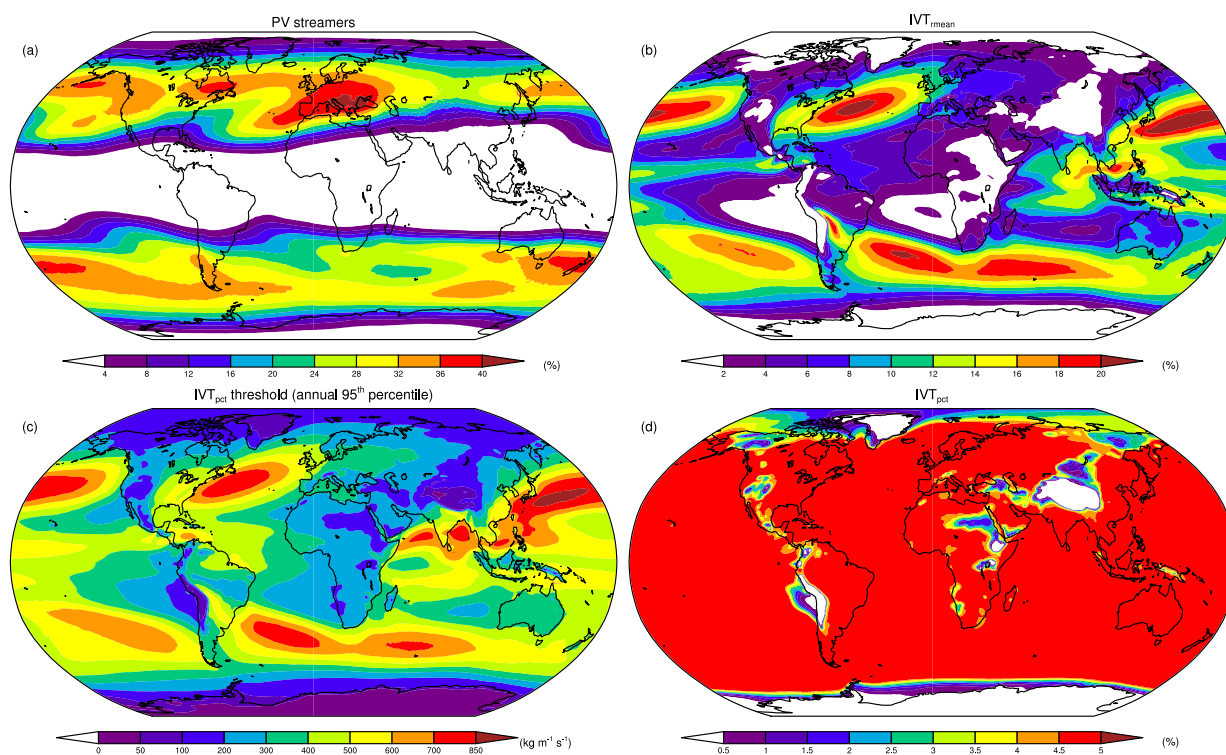

**Figure 5.** Climatological frequencies, based on 6-hourly occurrences for the period of 1979-2018, of (a) vertically aggregated stratospheric PV streamers between 300-350 K, (b) IVT structures in the  $IVT_{filt}$  form, and (d) IVT structures in the IVT<sub>pct</sub> form. In (c) full IVT magnitude values ( $kg\ m^{-1}\ s^{-1}$ ) that correspond to the annual 95<sup>th</sup> percentile used as threshold for the identification of IVT<sub>pct</sub> structures.



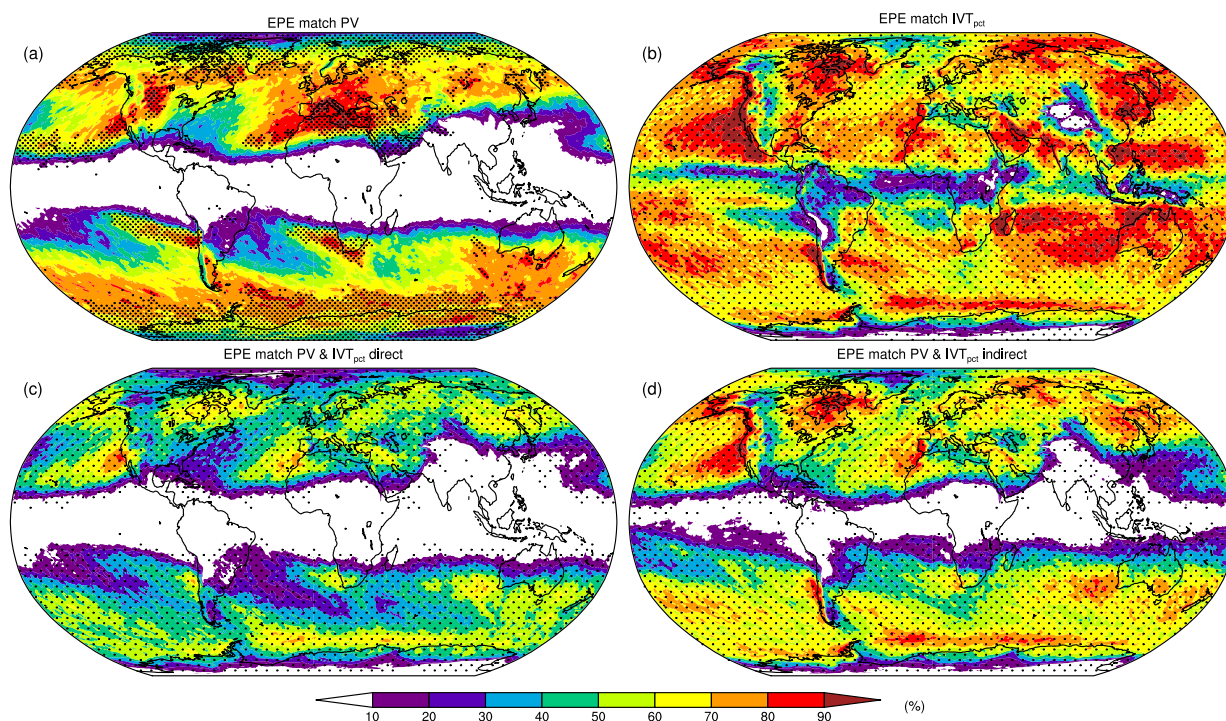

**Figure 6.** Fractions (%) of extreme precipitation objects that match (a) PV structures, (b) IVT<sub>pct</sub> structures, (c) combined PV and IVT structures with a direct PV influence, and (d) combined PV and IVT structures whereby an indirect PV influence is allowed, see the text for details. The climatologies are based on the ERA-Interim period of 1979–2018. All matches that involve PV structures are based on isentropic surfaces between 300–350 K with 5 K intervals. The stippling indicates where the fractions are statistically significant at the 95% level based on the Monte Carlo test.



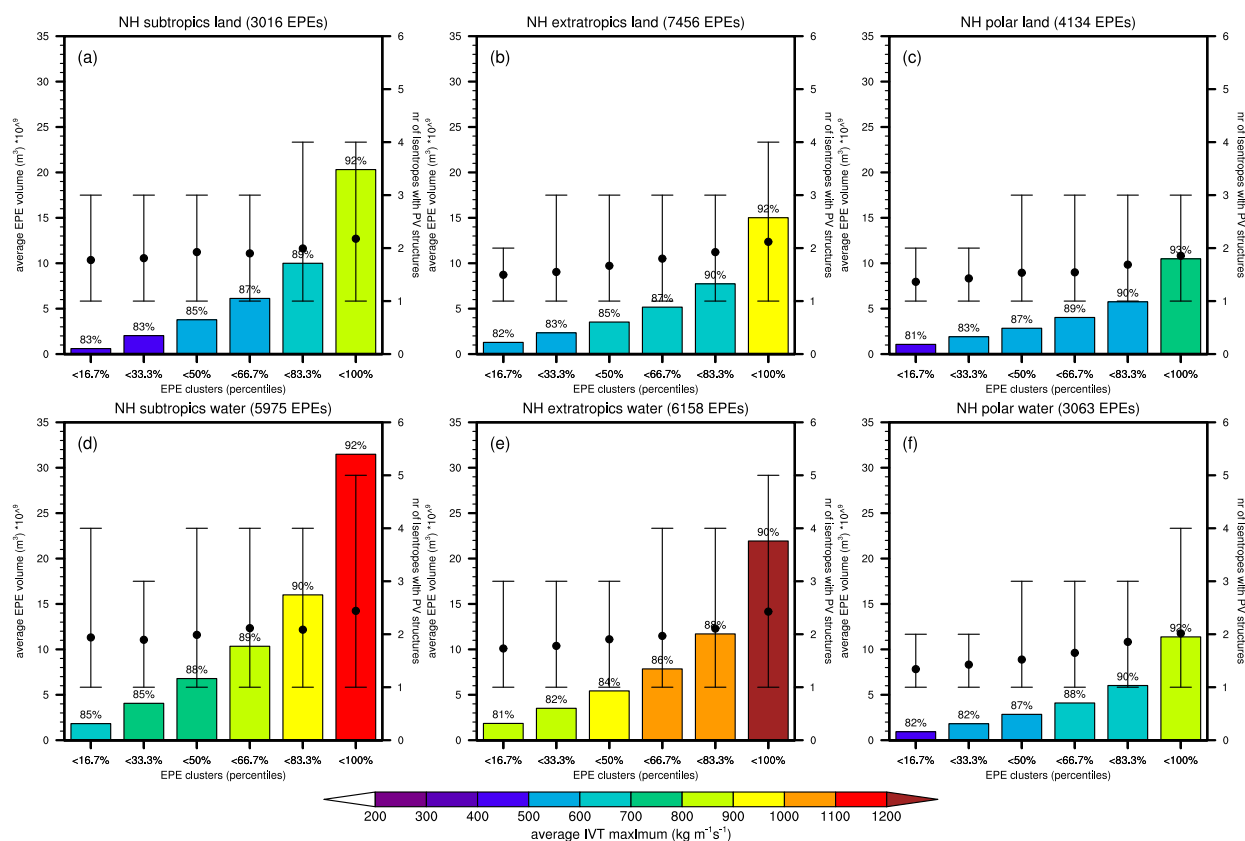

**Figure 7.** Characteristics of PV and IVT structures for EPEs, linked to combined wave breaking and intense moisture transport, divided and ranked in 6 clusters based on their precipitation volumes for the Northern Hemispheric (left) subtropics ( $20^{\circ}$ - $40^{\circ}$  N), (middle) extratropics ( $40^{\circ}$ - $60^{\circ}$  N), and (right) polar regions ( $60^{\circ}$ - $80^{\circ}$  N), over (top) land and (bottom) water. The number of isentropes with PV structures is shown by the 10th to 90th percentile range and average by the dot as indicated by the y-axis on the right, and the average of the IVT maxima ( $\text{kg m}^{-1} \text{s}^{-1}$ ) is shown by the colours of the bars. The height of the bars corresponds to the average precipitation volumes ( $\text{m}^3$ ) of each EPE cluster, as indicated by the y-axis on the left. The number of EPEs for each region is included in the figure titles, and the numbers above the colour bars indicate the fractions (%) of 6-hourly time instances with combined PV and IVT structures during the daily EPEs.

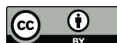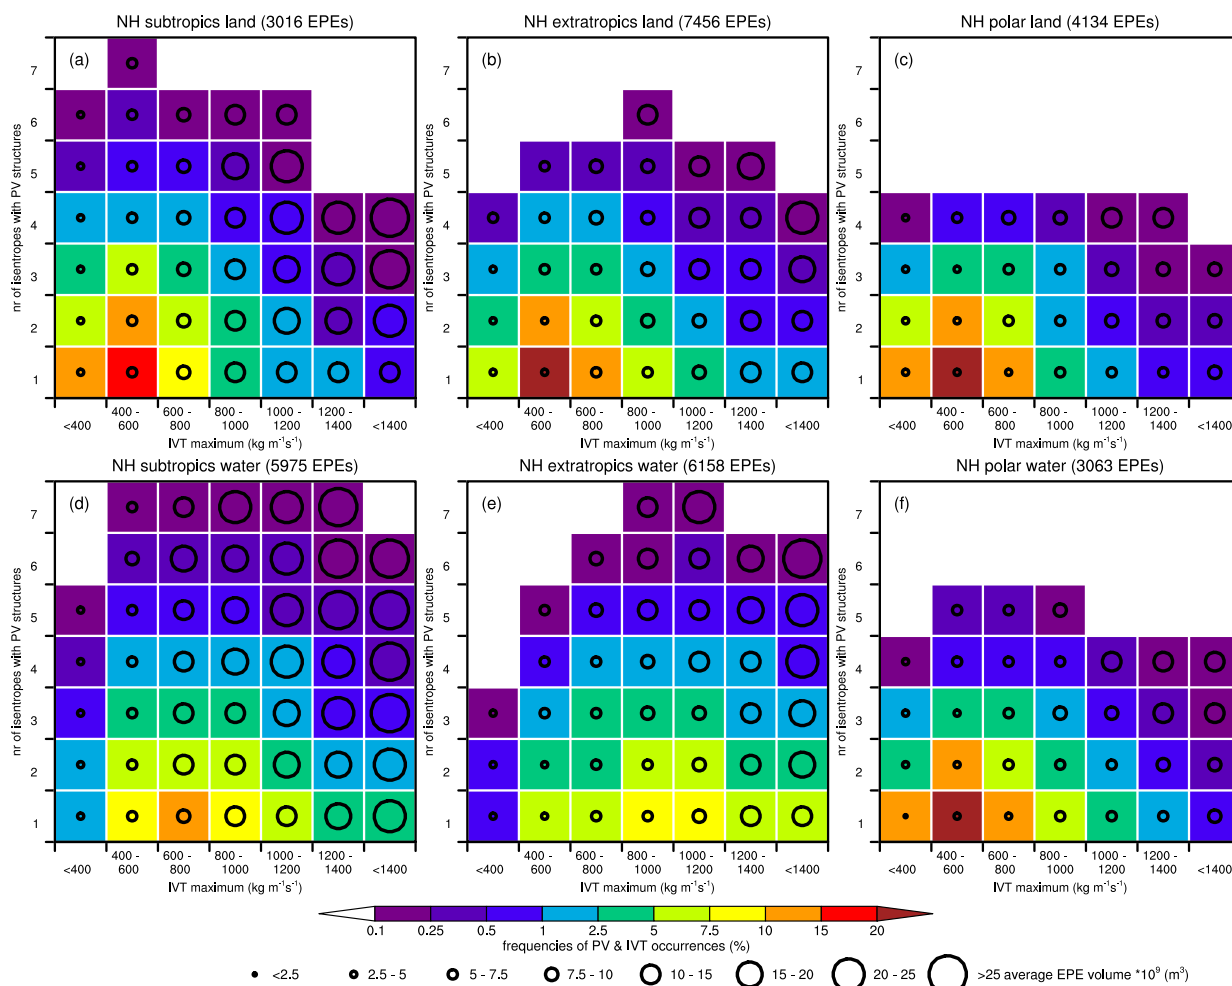

**Figure 8.** Characteristics of PV and IVT structures, for clusters defined by the number of isentropes with PV structures and the IVT maxima ( $\text{kg m}^{-1} \text{s}^{-1}$ ), with the corresponding average precipitation volumes of the EPEs in the circles as denoted by the legend. As in Fig. 7, the plot is based on EPEs, linked to combined wave breaking and intense moisture transport, for identical regions. The colours of the squares reflect the frequencies (%) of the PV and IVT structures that fall in the corresponding clusters and are relative to the total number of 6-hourly time instances during all EPEs that are linked to combined wave breaking and intense moisture transport.

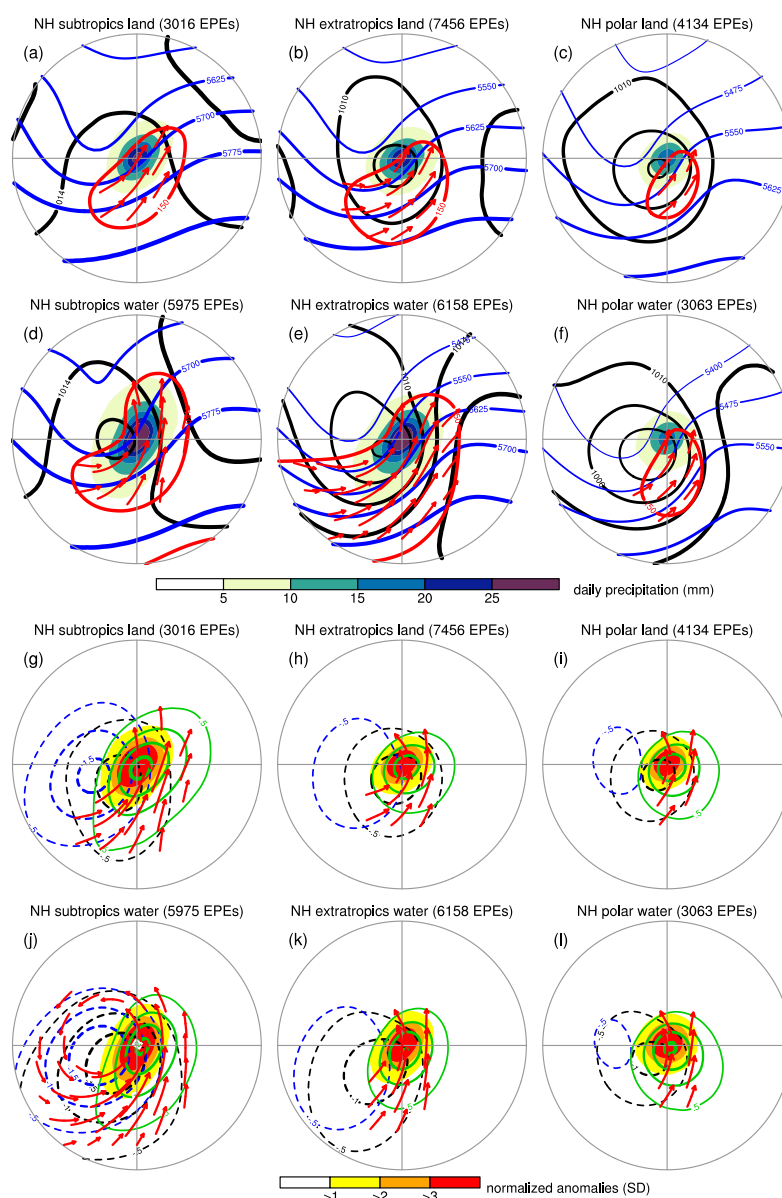

**Figure 9.** Composites of the tropospheric circulation for EPEs linked to combined Rossby wave breaking and intense moisture transport with (a-f) daily means and (g-l) normalized anomalies. The composites have a radius of 2000 km and are centred on the mass-weighted centres of the EPEs for subtropical (20°–40° N), extratropical (40°–60° N), and polar (60°–80° N) regions in the Northern Hemisphere over (first and third row) land and (second and fourth row) water during the period of 1979–2018. Shading in (a)–(f) shows daily precipitation (mm) and in (g)–(l) their normalized anomalies (SD). The contour lines in (a)–(f) show daily means of the 500-hPa geopotential height (gpm, in blue), mean sea level pressure (hPa; in black), and the IVT magnitude (150 kg m<sup>−1</sup> s<sup>−1</sup> contour in red) with IVT vectors where the IVT magnitude exceeds 150 kg m<sup>−1</sup> s<sup>−1</sup>. The contour lines in (g)–(l) show normalized anomalies, in colours as in (a)–(f), in standard deviation (SD) for intervals of  $\pm 0.5$  SD starting at  $\pm 0.5$  SD, with only contours for negative values of 500-hPa geopotential height and mean sea level pressure, and for positive values of total column water (in green). Also, in (g)–(l), IVT vectors constructed from their zonal and meridional components, and only displayed where their vector length exceeds 1 SD.

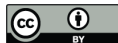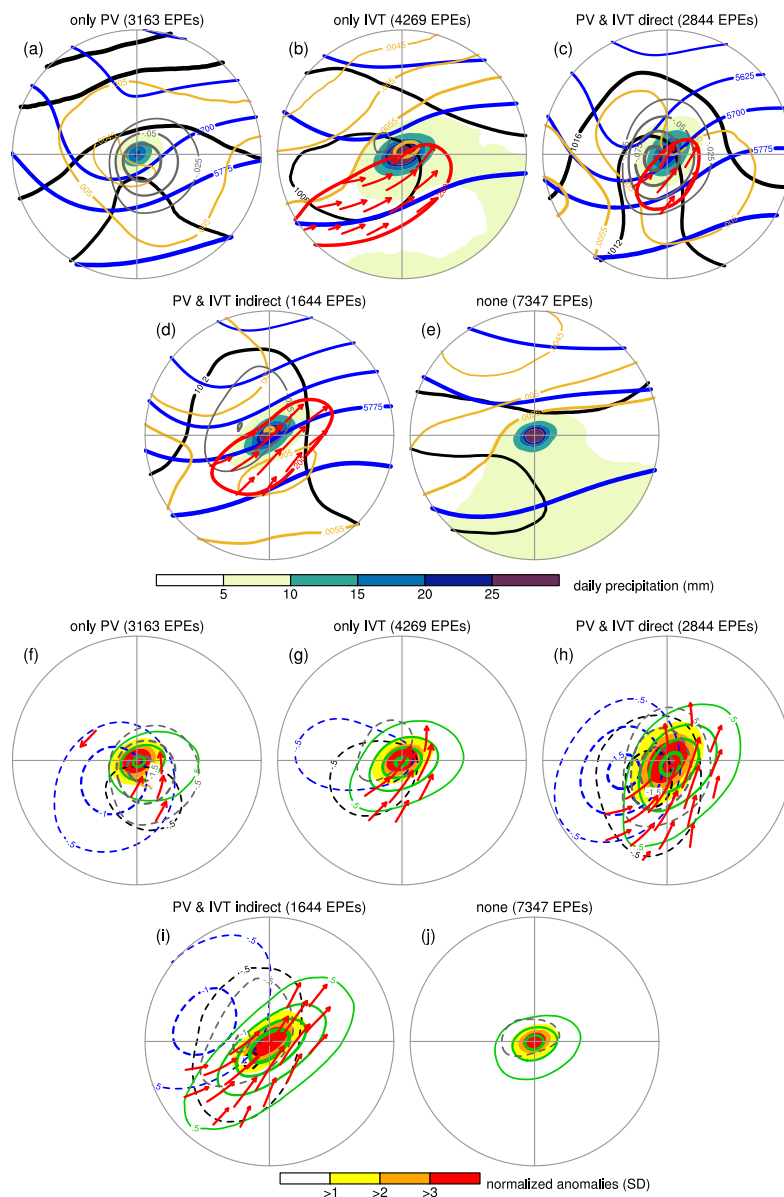

**Figure 10.** Composites, as in Fig. 9, but for EPEs over subtropical land, for the period of 1979-2016, and for five exclusive categories of EPEs that match (a,f) only PV structures, (b,g) only IVT structures, (c,h) combined PV and IVT structures with a direct PV influence, (d,i) combined PV and IVT structures with only an indirect PV influence, and (e,j) neither PV structures nor IVT structures, as detailed in the text and Table 1. The composites also include in (a)-(e) daily mean contours of QG ascent ( $\text{Pa s}^{-1}$ , in grey) and static stability ( $\text{K m}^2 \text{kg}^{-1}$ , in orange), and in (f)-(j) their normalized anomalies in identical colours, whereby those of static stability are displayed for intervals of  $-0.25$  SD starting at  $\sim -0.25$  SD. Different from Fig. 9, the IVT contours in (a)-(e) correspond to a  $200 \text{ kg m}^{-1} \text{s}^{-1}$  value with IVT vectors shown where the IVT magnitude exceeds  $200 \text{ kg m}^{-1} \text{s}^{-1}$ .

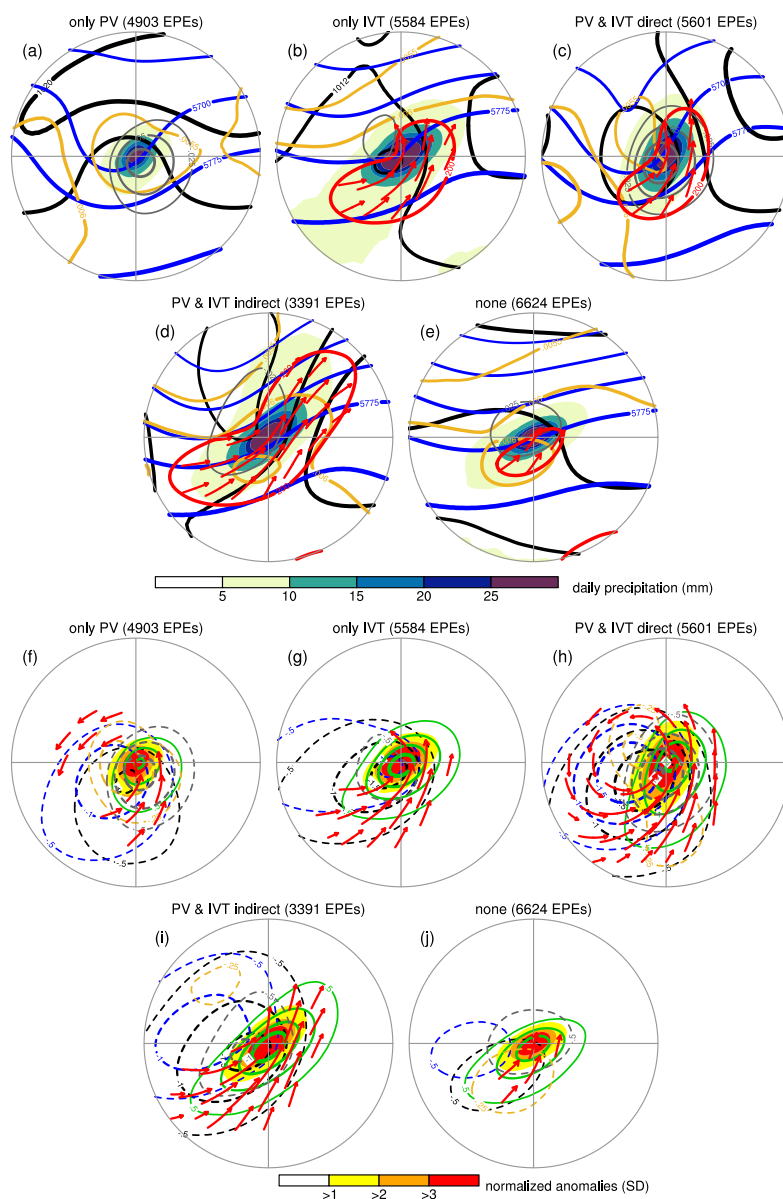

**Figure 11.** As Figure 10, but for EPEs over subtropical water.

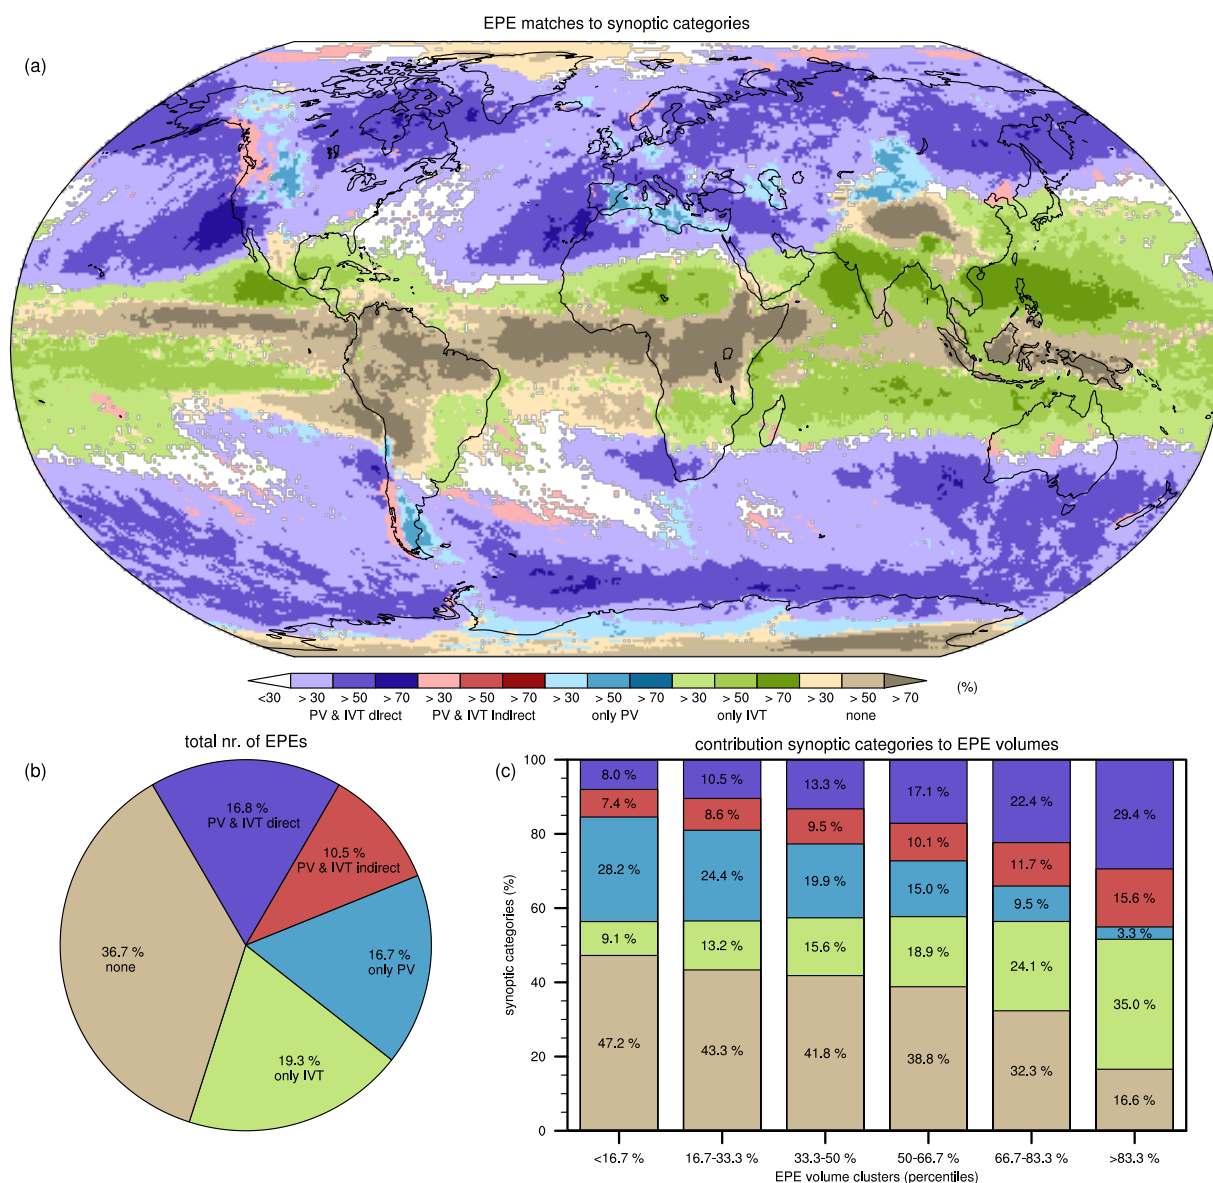

**Figure 12.** Climatology of EPEs linked to the five exclusive categories, as detailed in section 6.2 and Table 2, as indicated by the legend from left to right: combined PV and IVT structures with a direct PV influence (PV & IVT direct, in purple), combined PV and IVT structures with only an indirect PV influence (PV & IVT indirect, in red), only PV structures (only PV, in blue), only IVT structures (only IVT, in green), and neither PV structures nor IVT structures (none, in brown-grey). In (a) their geographical distribution in fractions (%), (b) their share in the total number of EPEs, and (c) their share in six EPE clusters defined and ranked based on the precipitation volumes (%). Fractions in (a) are always shown for the category with the highest values, as shown in the legend, except for category 4 (PV & IVT indirect), which are given advantage over category 3 (PV & IVT direct), provided the category 4 fractions exceed 30 %, as indicated by the legend, with the aim to emphasize the regions where this category is relatively important.

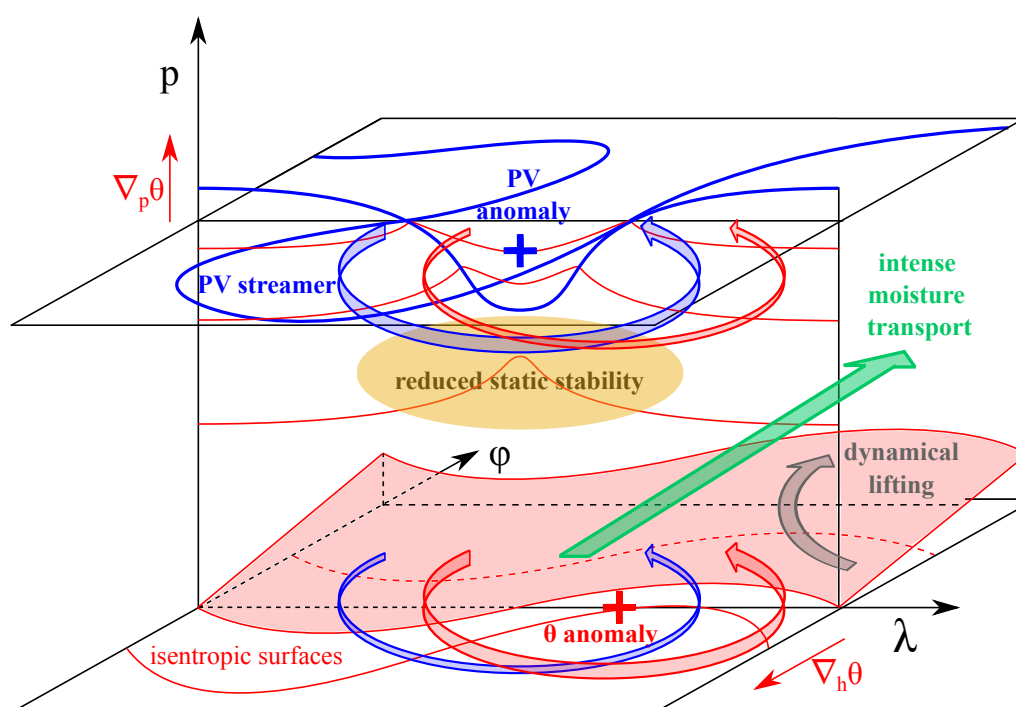

**Figure 13.** Schematic representation of the meteorological processes, including Rossby wave breaking and intense moisture transport, that lead the formation of EPEs (adapted from De Vries, 2017). This figure depicts (1) intense poleward and eastward moisture transport (green arrow) on the downstream flank of the stratospheric PV streamer, (2) an upper-level PV anomaly in blue and theta anomaly near the surface in red, that interact and mutually strengthen each other, consistent with baroclinic wave growth, and (3) forcing of upward motion induced by the upper-level PV anomaly; reduced static stability beneath the anomaly (in orange) and dynamical lifting (in grey) ahead. This model is based on well-established and longstanding concepts in the meteorology, including baroclinic wave growth in a PV perspective from Hoskins et al., (1985), their figures 15 and 21, and forcing mechanism of upward motion from Funatsu and Waugh (2008), their figure 1, the introduction section of Schlemmer et al. (2010), and section 6 of Martius et al. (2013). This study complements this model with climatological evidence, derived from the composites in Figs. 10 and 11, and integrates the role of Rossby wave breaking and intense moisture transport for the formation of EPEs.
